# Supplementary material for: Integrative analysis identifies oxidative stress biomarkers in non-alcoholic fatty liver disease via machine learning and weighted gene co-expression network analysis
Source: Frontiers journal article supplement (doi:10.3389/fimmu.2024.1335112), 2024-02-27
Supplement: Data_Sheet_1.ZIP [file Data_Sheet_1.ZIP]

ONTOLOGY	ID	Description	GeneRatio	BgRatio	pvalue	p.adjust	qvalue	geneID	Count
BP	GO:0034599	cellular response to oxidative stress	8/31	288/18903	1.53348805596233e-08	2.64526689653502e-05	1.4818337214457e-05	HSPA1A/IL6/NQO1/SRC/TLR4/GPX1/NFE2L2/GLRX2	8
BP	GO:0042542	response to hydrogen peroxide	6/31	130/18903	6.0234512252674e-08	3.57084754309898e-05	2.00032832620281e-05	IL6/NQO1/SRC/GPX1/NFE2L2/GLRX2	6
BP	GO:0062197	cellular response to chemical stress	8/31	345/18903	6.21016964017213e-08	3.57084754309898e-05	2.00032832620281e-05	HSPA1A/IL6/NQO1/SRC/TLR4/GPX1/NFE2L2/GLRX2	8
BP	GO:0006979	response to oxidative stress	8/31	434/18903	3.59259657465804e-07	0.000154930727282128	8.67895698825285e-05	HSPA1A/IL6/NQO1/SRC/TLR4/GPX1/NFE2L2/GLRX2	8
BP	GO:0045454	cell redox homeostasis	4/31	41/18903	5.74328068724129e-07	0.000198143183709825	0.000110996456229211	NQO1/GPX1/NFE2L2/GLRX2	4
BP	GO:0031667	response to nutrient levels	8/31	474/18903	6.99872438807908e-07	0.000201213326157273	0.000112716298039589	ACADM/BCHE/BCKDHB/NQO1/SPP1/SRC/GPX1/NFE2L2	8
BP	GO:0000302	response to reactive oxygen species	6/31	204/18903	8.62941766649058e-07	0.000212653506781375	0.000119124893501329	IL6/NQO1/SRC/GPX1/NFE2L2/GLRX2	6
BP	GO:0048545	response to steroid hormone	7/31	339/18903	1.01829879090981e-06	0.000219570676789929	0.000122999775007264	BCHE/BCKDHB/HSPA1A/IL6/NR3C1/SPP1/SRC	7
BP	GO:0034614	cellular response to reactive oxygen species	5/31	150/18903	4.23354835695692e-06	0.00079564631702764	0.000445707593611822	IL6/NQO1/SRC/NFE2L2/GLRX2	5
BP	GO:0007584	response to nutrient	5/31	154/18903	4.81529375269653e-06	0.00079564631702764	0.000445707593611822	BCHE/BCKDHB/NQO1/SPP1/GPX1	5
BP	GO:0009410	response to xenobiotic stimulus	7/31	432/18903	5.07368665930669e-06	0.00079564631702764	0.000445707593611822	BCHE/FMO4/NQO1/SRC/CDKN1B/GPX1/NFE2L2	7
BP	GO:0048732	gland development	7/31	441/18903	5.80822113125021e-06	0.000834931787617218	0.000467714648990149	ACADM/IL6/MAP2K1/NR3C1/SRC/CDKN1B/GPX1	7
BP	GO:0031960	response to corticosteroid	5/31	165/18903	6.74318370815628e-06	0.00089476860742843	0.000501234222193317	BCHE/BCKDHB/IL6/NR3C1/SRC	5
BP	GO:0071450	cellular response to oxygen radical	3/31	25/18903	8.96328268693342e-06	0.00103077750899734	0.000577424105726658	NQO1/NFE2L2/GLRX2	3
BP	GO:0071451	cellular response to superoxide	3/31	25/18903	8.96328268693342e-06	0.00103077750899734	0.000577424105726658	NQO1/NFE2L2/GLRX2	3
BP	GO:0006575	cellular modified amino acid metabolic process	5/31	180/18903	1.02932516122945e-05	0.0011097411894505	0.0006216582223741	ACADL/ACADM/GPX1/NFE2L2/GLRX2	5
BP	GO:0000303	response to superoxide	3/31	28/18903	1.27243547933387e-05	0.00128710355453393	0.000721013615903677	NQO1/NFE2L2/GLRX2	3
BP	GO:0031099	regeneration	5/31	192/18903	1.40681841831479e-05	0.00128710355453393	0.000721013615903677	IL6/MAP2K1/SPP1/CDKN1B/GPX1	5
BP	GO:0000305	response to oxygen radical	3/31	29/18903	1.41767927745767e-05	0.00128710355453393	0.000721013615903677	NQO1/NFE2L2/GLRX2	3
BP	GO:0070301	cellular response to hydrogen peroxide	4/31	93/18903	1.56028460923083e-05	0.00134574547546159	0.000753863826986265	IL6/NQO1/SRC/NFE2L2	4
BP	GO:0006099	tricarboxylic acid cycle	3/31	31/18903	1.74010050897552e-05	0.00142936827522989	0.00080070790337821	SDHD/OGDH/SDHC	3
BP	GO:2001243	negative regulation of intrinsic apoptotic signaling pathway	4/31	101/18903	2.16202272384112e-05	0.00169522236301178	0.000949634861476624	HSPA1A/SRC/GPX1/NFE2L2	4
BP	GO:0007596	blood coagulation	5/31	225/18903	3.01669914664972e-05	0.00226252435998729	0.0012674278336954	APOH/IL6/SRC/TLR4/NFE2L2	5
BP	GO:0050817	coagulation	5/31	230/18903	3.35109347843955e-05	0.00236069404703124	0.00132242083000743	APOH/IL6/SRC/TLR4/NFE2L2	5
BP	GO:0007599	hemostasis	5/31	231/18903	3.42129572033513e-05	0.00236069404703124	0.00132242083000743	APOH/IL6/SRC/TLR4/NFE2L2	5
BP	GO:0045124	regulation of bone resorption	3/31	41/18903	4.08111413443471e-05	0.00270766226226918	0.00151678654874942	IL6/SPP1/SRC	3
BP	GO:0046850	regulation of bone remodeling	3/31	48/18903	6.57040269416271e-05	0.00419775727682618	0.00235151254317402	IL6/SPP1/SRC	3
BP	GO:0042060	wound healing	6/31	442/18903	7.08083113878401e-05	0.00436229775514372	0.00244368533285854	APOH/IL6/SRC/TLR4/GPX1/NFE2L2	6
BP	GO:0051384	response to glucocorticoid	4/31	142/18903	8.20307311560986e-05	0.0048794141808369	0.00273336519786928	BCHE/BCKDHB/IL6/NR3C1	4
BP	GO:0071456	cellular response to hypoxia	4/31	151/18903	0.000104082037908106	0.00598471717971612	0.00335253722104006	SDHD/SRC/CDKN1B/NFE2L2	4
BP	GO:0006749	glutathione metabolic process	3/31	57/18903	0.000110048015026137	0.00612363954580925	0.00343035917806431	GPX1/NFE2L2/GLRX2	3
BP	GO:0036294	cellular response to decreased oxygen levels	4/31	159/18903	0.000127048014081151	0.00684868200906205	0.0038365156883716	SDHD/SRC/CDKN1B/NFE2L2	4
BP	GO:0051593	response to folic acid	2/31	11/18903	0.000141843180058271	0.00706716495871505	0.00395890613705594	BCHE/GPX1	2
BP	GO:0032757	positive regulation of interleukin-8 production	3/31	63/18903	0.000148363531464625	0.00706716495871505	0.00395890613705594	HSPA1A/IL6/TLR4	3
BP	GO:0045453	bone resorption	3/31	63/18903	0.000148363531464625	0.00706716495871505	0.00395890613705594	IL6/SPP1/SRC	3
BP	GO:0007568	aging	4/31	169/18903	0.000160674713748013	0.00706716495871505	0.00395890613705594	NQO1/GPX1/NFE2L2/GLRX2	4
BP	GO:0033539	fatty acid beta-oxidation using acyl-CoA dehydrogenase	2/31	12/18903	0.000170037849603076	0.00706716495871505	0.00395890613705594	ACADL/ACADM	2
BP	GO:1903800	positive regulation of miRNA maturation	2/31	12/18903	0.000170037849603076	0.00706716495871505	0.00395890613705594	IL6/MAP2K1	2
BP	GO:1903034	regulation of response to wounding	4/31	172/18903	0.00017190895827587	0.00706716495871505	0.00395890613705594	APOH/MAP2K1/SPP1/NFE2L2	4
BP	GO:2001242	regulation of intrinsic apoptotic signaling pathway	4/31	172/18903	0.00017190895827587	0.00706716495871505	0.00395890613705594	HSPA1A/SRC/GPX1/NFE2L2	4
BP	GO:0048660	regulation of smooth muscle cell proliferation	4/31	175/18903	0.000183701007727454	0.00706716495871505	0.00395890613705594	IL6/SRC/TLR4/CDKN1B	4
BP	GO:0071453	cellular response to oxygen levels	4/31	175/18903	0.000183701007727454	0.00706716495871505	0.00395890613705594	SDHD/SRC/CDKN1B/NFE2L2	4
BP	GO:0022900	electron transport chain	4/31	176/18903	0.000187758477601867	0.00706716495871505	0.00395890613705594	NDUFA4/SDHD/GLRX2/SDHC	4
BP	GO:0015980	energy derivation by oxidation of organic compounds	5/31	333/18903	0.000191957068359474	0.00706716495871505	0.00395890613705594	ACADM/NDUFA4/SDHD/OGDH/SDHC	5
BP	GO:0060249	anatomical structure homeostasis	5/31	333/18903	0.000191957068359474	0.00706716495871505	0.00395890613705594	IL6/SPP1/SRC/TLR4/IMMT	5
BP	GO:0061180	mammary gland epithelium development	3/31	69/18903	0.000194449542855623	0.00706716495871505	0.00395890613705594	NR3C1/SRC/GPX1	3
BP	GO:0048659	smooth muscle cell proliferation	4/31	179/18903	0.000200319792706153	0.00706716495871505	0.00395890613705594	IL6/SRC/TLR4/CDKN1B	4
BP	GO:0009437	carnitine metabolic process	2/31	13/18903	0.000200748453899732	0.00706716495871505	0.00395890613705594	ACADL/ACADM	2
BP	GO:0070424	regulation of nucleotide-binding oligomerization domain containing signaling pathway	2/31	13/18903	0.000200748453899732	0.00706716495871505	0.00395890613705594	HSPA1A/TLR4	2
BP	GO:0062012	regulation of small molecule metabolic process	5/31	339/18903	0.00020855212348865	0.00719504826035844	0.00403054419710697	ACADL/ACADM/FMO4/NR3C1/SRC	5
BP	GO:0071466	cellular response to xenobiotic stimulus	4/31	183/18903	0.000217998602952802	0.00737348215869771	0.00413049984542151	BCHE/FMO4/NQO1/NFE2L2	4
BP	GO:0031334	positive regulation of protein-containing complex assembly	4/31	192/18903	0.000261857302351386	0.00868661243377194	0.00486609318944479	HSPA1A/SRC/TLR4/CDKN1B	4
BP	GO:0046322	negative regulation of fatty acid oxidation	2/31	15/18903	0.000269686309394401	0.00870184566736899	0.00487462658895178	ACADL/FMO4	2
BP	GO:0009060	aerobic respiration	4/31	194/18903	0.000272405603500247	0.00870184566736899	0.00487462658895178	NDUFA4/SDHD/OGDH/SDHC	4
BP	GO:0042176	regulation of protein catabolic process	5/31	361/18903	0.000278958327857772	0.00874914755553922	0.00490112430571168	HSPA1A/NQO1/CDKN1B/GPX1/NFE2L2	5
BP	GO:1903201	regulation of oxidative stress-induced cell death	3/31	80/18903	0.000301222371859226	0.00927872484744938	0.00519778453696935	TLR4/GPX1/NFE2L2	3
BP	GO:0070431	nucleotide-binding oligomerization domain containing 2 signaling pathway	2/31	16/18903	0.000307898025332967	0.00931796655612925	0.00521976707766691	HSPA1A/TLR4	2
BP	GO:0048708	astrocyte differentiation	3/31	82/18903	0.00032396734553797	0.00963523570781033	0.00539749588391755	IL6/MAP2K1/TLR4	3
BP	GO:1901654	response to ketone	4/31	205/18903	0.000335966923422455	0.00982276174413109	0.00550254479396634	NQO1/NR3C1/SPP1/SRC	4
BP	GO:0006577	amino-acid betaine metabolic process	2/31	17/18903	0.000348594605438193	0.00985779826853907	0.00552217166164385	ACADL/ACADM	2
BP	GO:0036005	response to macrophage colony-stimulating factor	2/31	17/18903	0.000348594605438193	0.00985779826853907	0.00552217166164385	SPP1/TLR4	2
BP	GO:0034103	regulation of tissue remodeling	3/31	85/18903	0.000360117363476479	0.0100193943870472	0.00561269507082187	IL6/SPP1/SRC	3
BP	GO:0033273	response to vitamin	3/31	86/18903	0.000372720185348289	0.0100865725556259	0.00565032714328886	BCHE/SPP1/GPX1	3
BP	GO:0014910	regulation of smooth muscle cell migration	3/31	87/18903	0.00038560387470015	0.0100865725556259	0.00565032714328886	SRC/TLR4/NFE2L2	3
BP	GO:0006390	mitochondrial transcription	2/31	18/18903	0.00039176832534895	0.0100865725556259	0.00565032714328886	TFAM/POLRMT	2
BP	GO:0045780	positive regulation of bone resorption	2/31	18/18903	0.00039176832534895	0.0100865725556259	0.00565032714328886	SPP1/SRC	2
BP	GO:2000641	regulation of early endosome to late endosome transport	2/31	18/18903	0.00039176832534895	0.0100865725556259	0.00565032714328886	MAP2K1/SRC	2
BP	GO:0050878	regulation of body fluid levels	5/31	390/18903	0.000397854922142829	0.010092643245535	0.00565372784097704	APOH/IL6/SRC/TLR4/NFE2L2	5
BP	GO:0046849	bone remodeling	3/31	89/18903	0.000412224461554169	0.0102699644674852	0.00575306018682007	IL6/SPP1/SRC	3
BP	GO:0046034	ATP metabolic process	4/31	217/18903	0.000416752181289254	0.0102699644674852	0.00575306018682007	HSPA1A/SDHD/OGDH/SDHC	4
BP	GO:1902176	negative regulation of oxidative stress-induced intrinsic apoptotic signaling pathway	2/31	19/18903	0.000437411477952073	0.0105416713958828	0.00590526580712153	GPX1/NFE2L2	2
BP	GO:1901216	positive regulation of neuron death	3/31	91/18903	0.000440000197393369	0.0105416713958828	0.00590526580712153	NQO1/NR3C1/TLR4	3
BP	GO:0019646	aerobic electron transport chain	3/31	93/18903	0.000468951935597796	0.0110813984781671	0.00620761177907393	NDUFA4/SDHD/SDHC	3
BP	GO:0014909	smooth muscle cell migration	3/31	95/18903	0.000499100310896547	0.0114793071506206	0.00643051347934078	SRC/TLR4/NFE2L2	3
BP	GO:1900407	regulation of cellular response to oxidative stress	3/31	95/18903	0.000499100310896547	0.0114793071506206	0.00643051347934078	TLR4/GPX1/NFE2L2	3
BP	GO:0071902	positive regulation of protein serine/threonine kinase activity	4/31	229/18903	0.000510580726441302	0.0115888388567269	0.00649187128633124	MAP2K1/SRC/TLR4/CDKN1B	4
BP	GO:0021756	striatum development	2/31	21/18903	0.000536075338825017	0.0117863034036988	0.00660248758175166	HPRT1/OGDH	2
BP	GO:0071498	cellular response to fluid shear stress	2/31	21/18903	0.000536075338825017	0.0117863034036988	0.00660248758175166	SRC/NFE2L2	2
BP	GO:2001234	negative regulation of apoptotic signaling pathway	4/31	233/18903	0.000544953585647116	0.0117863034036988	0.00660248758175166	HSPA1A/SRC/GPX1/NFE2L2	4
BP	GO:0048661	positive regulation of smooth muscle cell proliferation	3/31	98/18903	0.000546611172345453	0.0117863034036988	0.00660248758175166	IL6/SRC/TLR4	3
BP	GO:0072593	reactive oxygen species metabolic process	4/31	235/18903	0.000562744738084423	0.0118450370174755	0.00663538915761555	NQO1/TLR4/GPX1/NFE2L2	4
BP	GO:2001237	negative regulation of extrinsic apoptotic signaling pathway	3/31	99/18903	0.000563068426337964	0.0118450370174755	0.00663538915761555	HSPA1A/SRC/GPX1	3
BP	GO:0036473	cell death in response to oxidative stress	3/31	100/18903	0.000579839994295308	0.0119074284542786	0.00667033978399865	TLR4/GPX1/NFE2L2	3
BP	GO:0098869	cellular oxidant detoxification	3/31	100/18903	0.000579839994295308	0.0119074284542786	0.00667033978399865	NQO1/GPX1/NFE2L2	3
BP	GO:0042773	ATP synthesis coupled electron transport	3/31	101/18903	0.000596928354511335	0.0119439045189961	0.0066907730577809	NDUFA4/SDHD/SDHC	3
BP	GO:0042775	mitochondrial ATP synthesis coupled electron transport	3/31	101/18903	0.000596928354511335	0.0119439045189961	0.0066907730577809	NDUFA4/SDHD/SDHC	3
BP	GO:0045333	cellular respiration	4/31	240/18903	0.000609029591759506	0.0119439045189961	0.0066907730577809	NDUFA4/SDHD/OGDH/SDHC	4
BP	GO:0009205	purine ribonucleoside triphosphate metabolic process	4/31	242/18903	0.000628280501001168	0.0119439045189961	0.0066907730577809	HSPA1A/SDHD/OGDH/SDHC	4
BP	GO:0032677	regulation of interleukin-8 production	3/31	103/18903	0.000632065298444649	0.0119439045189961	0.0066907730577809	HSPA1A/IL6/TLR4	3
BP	GO:0046395	carboxylic acid catabolic process	4/31	243/18903	0.000638066583672131	0.0119439045189961	0.0066907730577809	ACADL/ACADM/BCKDHB/PAH	4
BP	GO:0019430	removal of superoxide radicals	2/31	23/18903	0.000644524874860618	0.0119439045189961	0.0066907730577809	NQO1/NFE2L2	2
BP	GO:0032637	interleukin-8 production	3/31	104/18903	0.000650118772420406	0.0119439045189961	0.0066907730577809	HSPA1A/IL6/TLR4	3
BP	GO:1902882	regulation of response to oxidative stress	3/31	104/18903	0.000650118772420406	0.0119439045189961	0.0066907730577809	TLR4/GPX1/NFE2L2	3
BP	GO:1901655	cellular response to ketone	3/31	105/18903	0.00066849881925221	0.0119439045189961	0.0066907730577809	NR3C1/SPP1/SRC	3
BP	GO:0009144	purine nucleoside triphosphate metabolic process	4/31	247/18903	0.000678297592333559	0.0119439045189961	0.0066907730577809	HSPA1A/SDHD/OGDH/SDHC	4
BP	GO:0016054	organic acid catabolic process	4/31	247/18903	0.000678297592333559	0.0119439045189961	0.0066907730577809	ACADL/ACADM/BCKDHB/PAH	4
BP	GO:0033002	muscle cell proliferation	4/31	247/18903	0.000678297592333559	0.0119439045189961	0.0066907730577809	IL6/SRC/TLR4/CDKN1B	4
BP	GO:0009199	ribonucleoside triphosphate metabolic process	4/31	249/18903	0.000699074613541052	0.0119439045189961	0.0066907730577809	HSPA1A/SDHD/OGDH/SDHC	4
BP	GO:0010226	response to lithium ion	2/31	24/18903	0.000702400185604089	0.0119439045189961	0.0066907730577809	CDKN1B/NFE2L2	2
BP	GO:0036120	cellular response to platelet-derived growth factor stimulus	2/31	24/18903	0.000702400185604089	0.0119439045189961	0.0066907730577809	SRC/TLR4	2
BP	GO:2000637	positive regulation of miRNA-mediated gene silencing	2/31	24/18903	0.000702400185604089	0.0119439045189961	0.0066907730577809	IL6/MAP2K1	2
BP	GO:0010906	regulation of glucose metabolic process	3/31	107/18903	0.000706248267210206	0.0119439045189961	0.0066907730577809	ACADM/NR3C1/SRC	3
BP	GO:0014812	muscle cell migration	3/31	108/18903	0.000725622453496176	0.0121126907101782	0.00678532422391675	SRC/TLR4/NFE2L2	3
BP	GO:0009150	purine ribonucleotide metabolic process	5/31	447/18903	0.000739355870278324	0.0121126907101782	0.00678532422391675	HSPA1A/SDHD/HPRT1/OGDH/SDHC	5
BP	GO:0060148	positive regulation of post-transcriptional gene silencing	2/31	25/18903	0.000762699046727319	0.0121126907101782	0.00678532422391675	IL6/MAP2K1	2
BP	GO:0070423	nucleotide-binding oligomerization domain containing signaling pathway	2/31	25/18903	0.000762699046727319	0.0121126907101782	0.00678532422391675	HSPA1A/TLR4	2
BP	GO:1900370	positive regulation of post-transcriptional gene silencing by RNA	2/31	25/18903	0.000762699046727319	0.0121126907101782	0.00678532422391675	IL6/MAP2K1	2
BP	GO:0019395	fatty acid oxidation	3/31	110/18903	0.00076538161588952	0.0121126907101782	0.00678532422391675	ACADL/ACADM/FMO4	3
BP	GO:1904035	regulation of epithelial cell apoptotic process	3/31	110/18903	0.00076538161588952	0.0121126907101782	0.00678532422391675	IL6/CDKN1B/NFE2L2	3
BP	GO:0035872	nucleotide-binding domain, leucine rich repeat containing receptor signaling pathway	2/31	26/18903	0.000825413870933615	0.0126003444899158	0.00705849961357297	HSPA1A/TLR4	2
BP	GO:0036119	response to platelet-derived growth factor	2/31	26/18903	0.000825413870933615	0.0126003444899158	0.00705849961357297	SRC/TLR4	2
BP	GO:0070102	interleukin-6-mediated signaling pathway	2/31	26/18903	0.000825413870933615	0.0126003444899158	0.00705849961357297	IL6/SRC	2
BP	GO:1903798	regulation of miRNA maturation	2/31	26/18903	0.000825413870933615	0.0126003444899158	0.00705849961357297	IL6/MAP2K1	2
BP	GO:1990748	cellular detoxification	3/31	115/18903	0.000870785028285331	0.0129640179394241	0.00726222332167282	NQO1/GPX1/NFE2L2	3
BP	GO:0021544	subpallium development	2/31	27/18903	0.000890537087912258	0.0129640179394241	0.00726222332167282	HPRT1/OGDH	2
BP	GO:0042133	neurotransmitter metabolic process	2/31	27/18903	0.000890537087912258	0.0129640179394241	0.00726222332167282	BCHE/PAH	2
BP	GO:0009259	ribonucleotide metabolic process	5/31	466/18903	0.000891530675734774	0.0129640179394241	0.00726222332167282	HSPA1A/SDHD/HPRT1/OGDH/SDHC	5
BP	GO:0034440	lipid oxidation	3/31	116/18903	0.000892913720383376	0.0129640179394241	0.00726222332167282	ACADL/ACADM/FMO4	3
BP	GO:0030522	intracellular receptor signaling pathway	4/31	266/18903	0.0008943293535023	0.0129640179394241	0.00726222332167282	HSPA1A/NR3C1/SRC/TLR4	4
BP	GO:0009141	nucleoside triphosphate metabolic process	4/31	267/18903	0.000906895288846397	0.0130130352277786	0.00728968197656799	HSPA1A/SDHD/OGDH/SDHC	4
BP	GO:0006805	xenobiotic metabolic process	3/31	118/18903	0.000938237353125662	0.0130130352277786	0.00728968197656799	BCHE/FMO4/NQO1	3
BP	GO:0030194	positive regulation of blood coagulation	2/31	28/18903	0.000958061144306021	0.0130130352277786	0.00728968197656799	APOH/NFE2L2	2
BP	GO:0070920	regulation of production of small RNA involved in gene silencing by RNA	2/31	28/18903	0.000958061144306021	0.0130130352277786	0.00728968197656799	IL6/MAP2K1	2
BP	GO:1900017	positive regulation of cytokine production involved in inflammatory response	2/31	28/18903	0.000958061144306021	0.0130130352277786	0.00728968197656799	IL6/TLR4	2
BP	GO:1900048	positive regulation of hemostasis	2/31	28/18903	0.000958061144306021	0.0130130352277786	0.00728968197656799	APOH/NFE2L2	2
BP	GO:1903649	regulation of cytoplasmic transport	2/31	28/18903	0.000958061144306021	0.0130130352277786	0.00728968197656799	MAP2K1/SRC	2
BP	GO:1904385	cellular response to angiotensin	2/31	28/18903	0.000958061144306021	0.0130130352277786	0.00728968197656799	SRC/NFE2L2	2
BP	GO:0019693	ribose phosphate metabolic process	5/31	475/18903	0.000971288556786351	0.0130896309410661	0.00733258959810749	HSPA1A/SDHD/HPRT1/OGDH/SDHC	5
BP	GO:0006163	purine nucleotide metabolic process	5/31	476/18903	0.000980468926634799	0.0131109216933723	0.00734451631701955	HSPA1A/SDHD/HPRT1/OGDH/SDHC	5
BP	GO:0032355	response to estradiol	3/31	121/18903	0.00100892209920834	0.0133006818337589	0.00745081673433453	NQO1/CDKN1B/GPX1	3
BP	GO:0001894	tissue homeostasis	4/31	275/18903	0.00101195824400294	0.0133006818337589	0.00745081673433453	IL6/SPP1/SRC/TLR4	4
BP	GO:0050673	epithelial cell proliferation	5/31	481/18903	0.00102734764039537	0.0133006818337589	0.00745081673433453	APOH/IL6/MAP2K1/CDKN1B/GPX1	5
BP	GO:1902175	regulation of oxidative stress-induced intrinsic apoptotic signaling pathway	2/31	29/18903	0.00102797850367872	0.0133006818337589	0.00745081673433453	GPX1/NFE2L2	2
BP	GO:0022904	respiratory electron transport chain	3/31	122/18903	0.00103321238592678	0.0133006818337589	0.00745081673433453	NDUFA4/SDHD/SDHC	3
BP	GO:0022612	gland morphogenesis	3/31	123/18903	0.00105787069357519	0.0134178451942442	0.00751644966487638	IL6/NR3C1/SRC	3
BP	GO:0097237	cellular response to toxic substance	3/31	123/18903	0.00105787069357519	0.0134178451942442	0.00751644966487638	NQO1/GPX1/NFE2L2	3
BP	GO:0050820	positive regulation of coagulation	2/31	30/18903	0.00110028164648284	0.0138539112422109	0.00776072648076254	APOH/NFE2L2	2
BP	GO:0048679	regulation of axon regeneration	2/31	31/18903	0.00117496307002719	0.0145813762287547	0.00816824004759529	MAP2K1/SPP1	2
BP	GO:0060603	mammary gland duct morphogenesis	2/31	31/18903	0.00117496307002719	0.0145813762287547	0.00816824004759529	NR3C1/SRC	2
BP	GO:0002862	negative regulation of inflammatory response to antigenic stimulus	2/31	32/18903	0.00125201528844465	0.0152093406518805	0.00852001508370788	SRC/GPX1	2
BP	GO:0031116	positive regulation of microtubule polymerization	2/31	32/18903	0.00125201528844465	0.0152093406518805	0.00852001508370788	HSPA1A/CDKN1B	2
BP	GO:1990776	response to angiotensin	2/31	32/18903	0.00125201528844465	0.0152093406518805	0.00852001508370788	SRC/NFE2L2	2
BP	GO:0030168	platelet activation	3/31	133/18903	0.00132516896196332	0.0159107972418352	0.00891295918718824	IL6/SRC/TLR4	3
BP	GO:0001666	response to hypoxia	4/31	296/18903	0.00132820568279668	0.0159107972418352	0.00891295918718824	SDHD/SRC/CDKN1B/NFE2L2	4
BP	GO:0097193	intrinsic apoptotic signaling pathway	4/31	298/18903	0.00136154395310364	0.0161976780627846	0.00907366496514801	HSPA1A/SRC/GPX1/NFE2L2	4
BP	GO:0035270	endocrine system development	3/31	135/18903	0.00138325811049255	0.0163432893191757	0.00915523392524989	IL6/MAP2K1/NR3C1	3
BP	GO:0034405	response to fluid shear stress	2/31	34/18903	0.00141320225035753	0.0163608985360184	0.0091650983103371	SRC/NFE2L2	2
BP	GO:0051450	myoblast proliferation	2/31	34/18903	0.00141320225035753	0.0163608985360184	0.0091650983103371	SRC/GPX1	2
BP	GO:0070570	regulation of neuron projection regeneration	2/31	34/18903	0.00141320225035753	0.0163608985360184	0.0091650983103371	MAP2K1/SPP1	2
BP	GO:1904019	epithelial cell apoptotic process	3/31	137/18903	0.00144292899632554	0.0165936834577438	0.00929550048159193	IL6/CDKN1B/NFE2L2	3
BP	GO:0030879	mammary gland development	3/31	138/18903	0.00147336264409112	0.0168314606692529	0.009428699249046	NR3C1/SRC/GPX1	3
BP	GO:0036293	response to decreased oxygen levels	4/31	309/18903	0.00155547017407629	0.0176525398044842	0.00988865387674537	SDHD/SRC/CDKN1B/NFE2L2	4
BP	GO:0031112	positive regulation of microtubule polymerization or depolymerization	2/31	36/18903	0.001583782980543	0.0177404262430953	0.00993788637141813	HSPA1A/CDKN1B	2
BP	GO:0046320	regulation of fatty acid oxidation	2/31	36/18903	0.001583782980543	0.0177404262430953	0.00993788637141813	ACADL/FMO4	2
BP	GO:0006734	NADH metabolic process	2/31	37/18903	0.0016725774719095	0.0186141686389928	0.0104273420659621	NQO1/OGDH	2
BP	GO:0006119	oxidative phosphorylation	3/31	147/18903	0.00176556800827418	0.0195231077838011	0.0109365143832368	NDUFA4/SDHD/SDHC	3
BP	GO:0033028	myeloid cell apoptotic process	2/31	39/18903	0.00185713777917154	0.0202757130953855	0.0113581111344402	APOH/IL6	2
BP	GO:0045922	negative regulation of fatty acid metabolic process	2/31	39/18903	0.00185713777917154	0.0202757130953855	0.0113581111344402	ACADL/FMO4	2
BP	GO:0001890	placenta development	3/31	150/18903	0.00187044182135901	0.0202925291939892	0.0113675312281203	MAP2K1/SPP1/CDKN1B	3
BP	GO:0098754	detoxification	3/31	154/18903	0.0020162260343702	0.0216019150138247	0.012101026991726	NQO1/GPX1/NFE2L2	3
BP	GO:0032733	positive regulation of interleukin-10 production	2/31	41/18903	0.0020509441419626	0.0216019150138247	0.012101026991726	IL6/TLR4	2
BP	GO:0070050	neuron cellular homeostasis	2/31	41/18903	0.0020509441419626	0.0216019150138247	0.012101026991726	IL6/IMMT	2
BP	GO:0010675	regulation of cellular carbohydrate metabolic process	3/31	155/18903	0.00205374728247377	0.0216019150138247	0.012101026991726	ACADM/NR3C1/SRC	3
BP	GO:2001236	regulation of extrinsic apoptotic signaling pathway	3/31	155/18903	0.00205374728247377	0.0216019150138247	0.012101026991726	HSPA1A/SRC/GPX1	3
BP	GO:0070482	response to oxygen levels	4/31	337/18903	0.00213489538908932	0.0220269166668268	0.0123391057209135	SDHD/SRC/CDKN1B/NFE2L2	4
BP	GO:0014002	astrocyte development	2/31	42/18903	0.00215129626475087	0.0220269166668268	0.0123391057209135	IL6/TLR4	2
BP	GO:0045022	early endosome to late endosome transport	2/31	42/18903	0.00215129626475087	0.0220269166668268	0.0123391057209135	MAP2K1/SRC	2
BP	GO:0071354	cellular response to interleukin-6	2/31	42/18903	0.00215129626475087	0.0220269166668268	0.0123391057209135	IL6/SRC	2
BP	GO:0006790	sulfur compound metabolic process	4/31	338/18903	0.00215799937199636	0.0220269166668268	0.0123391057209135	GPX1/NFE2L2/OGDH/GLRX2	4
BP	GO:0033574	response to testosterone	2/31	43/18903	0.00225393793908807	0.0227370932451867	0.0127369346142373	NQO1/SPP1	2
BP	GO:0051602	response to electrical stimulus	2/31	43/18903	0.00225393793908807	0.0227370932451867	0.0127369346142373	NQO1/SRC	2
BP	GO:0014075	response to amine	2/31	44/18903	0.00235886187849889	0.0235204435861883	0.013175754210295	NQO1/HPRT1	2
BP	GO:0014911	positive regulation of smooth muscle cell migration	2/31	44/18903	0.00235886187849889	0.0235204435861883	0.013175754210295	SRC/TLR4	2
BP	GO:0019216	regulation of lipid metabolic process	4/31	347/18903	0.0023738009570402	0.0235333715568641	0.01318299624055	ACADL/FMO4/NR3C1/SRC	4
BP	GO:0008631	intrinsic apoptotic signaling pathway in response to oxidative stress	2/31	45/18903	0.00246606081291752	0.023765111185937	0.0133128128565615	GPX1/NFE2L2	2
BP	GO:0060964	regulation of miRNA-mediated gene silencing	2/31	45/18903	0.00246606081291752	0.023765111185937	0.0133128128565615	IL6/MAP2K1	2
BP	GO:0062208	positive regulation of pattern recognition receptor signaling pathway	2/31	45/18903	0.00246606081291752	0.023765111185937	0.0133128128565615	HSPA1A/TLR4	2
BP	GO:0070741	response to interleukin-6	2/31	45/18903	0.00246606081291752	0.023765111185937	0.0133128128565615	IL6/SRC	2
BP	GO:0098927	vesicle-mediated transport between endosomal compartments	2/31	45/18903	0.00246606081291752	0.023765111185937	0.0133128128565615	MAP2K1/SRC	2
BP	GO:0042398	cellular modified amino acid biosynthetic process	2/31	46/18903	0.00257552748865628	0.0245457730272491	0.0137501264006192	ACADM/NFE2L2	2
BP	GO:0060443	mammary gland morphogenesis	2/31	46/18903	0.00257552748865628	0.0245457730272491	0.0137501264006192	NR3C1/SRC	2
BP	GO:0002861	regulation of inflammatory response to antigenic stimulus	2/31	47/18903	0.00268725466837407	0.025330679251067	0.0141898175758838	SRC/GPX1	2
BP	GO:1900368	regulation of post-transcriptional gene silencing by RNA	2/31	47/18903	0.00268725466837407	0.025330679251067	0.0141898175758838	IL6/MAP2K1	2
BP	GO:0032620	interleukin-17 production	2/31	48/18903	0.00280123513104504	0.0259791967798532	0.0145531061137484	IL6/TLR4	2
BP	GO:0032660	regulation of interleukin-17 production	2/31	48/18903	0.00280123513104504	0.0259791967798532	0.0145531061137484	IL6/TLR4	2
BP	GO:0060147	regulation of post-transcriptional gene silencing	2/31	48/18903	0.00280123513104504	0.0259791967798532	0.0145531061137484	IL6/MAP2K1	2
BP	GO:0010631	epithelial cell migration	4/31	366/18903	0.00287759825681784	0.0265446898021967	0.0148698857290109	APOH/SRC/GPX1/NFE2L2	4
BP	GO:0070997	neuron death	4/31	368/18903	0.00293457563169766	0.0268749491329431	0.0150548914136029	NQO1/NR3C1/TLR4/GPX1	4
BP	GO:1902905	positive regulation of supramolecular fiber organization	3/31	176/18903	0.00294455964413115	0.0268749491329431	0.0150548914136029	HSPA1A/CDKN1B/GPX1	3
BP	GO:0090132	epithelium migration	4/31	369/18903	0.00296335343428743	0.0268918675428666	0.0150643688203518	APOH/SRC/GPX1/NFE2L2	4
BP	GO:0000959	mitochondrial RNA metabolic process	2/31	50/18903	0.00303592710253136	0.0268918675428666	0.0150643688203518	TFAM/POLRMT	2
BP	GO:0021695	cerebellar cortex development	2/31	50/18903	0.00303592710253136	0.0268918675428666	0.0150643688203518	MAP2K1/OGDH	2
BP	GO:0045737	positive regulation of cyclin-dependent protein serine/threonine kinase activity	2/31	50/18903	0.00303592710253136	0.0268918675428666	0.0150643688203518	SRC/CDKN1B	2
BP	GO:0060966	regulation of gene silencing by RNA	2/31	50/18903	0.00303592710253136	0.0268918675428666	0.0150643688203518	IL6/MAP2K1	2
BP	GO:0001659	temperature homeostasis	3/31	178/18903	0.00303995024397623	0.0268918675428666	0.0150643688203518	ACADL/TLR4/GPX1	3
BP	GO:0048771	tissue remodeling	3/31	179/18903	0.00308835303575924	0.026959927704615	0.0151024949704571	IL6/SPP1/SRC	3
BP	GO:0060759	regulation of response to cytokine stimulus	3/31	179/18903	0.00308835303575924	0.026959927704615	0.0151024949704571	HSPA1A/IL6/TLR4	3
BP	GO:0090130	tissue migration	4/31	374/18903	0.00311015977577877	0.026959927704615	0.0151024949704571	APOH/SRC/GPX1/NFE2L2	4
BP	GO:2001233	regulation of apoptotic signaling pathway	4/31	374/18903	0.00311015977577877	0.026959927704615	0.0151024949704571	HSPA1A/SRC/GPX1/NFE2L2	4
BP	GO:0010543	regulation of platelet activation	2/31	52/18903	0.00327954596002367	0.0281453571196062	0.015766552455102	IL6/TLR4	2
BP	GO:0010823	negative regulation of mitochondrion organization	2/31	52/18903	0.00327954596002367	0.0281453571196062	0.015766552455102	HSPA1A/GPX1	2
BP	GO:0006111	regulation of gluconeogenesis	2/31	53/18903	0.0034046850909155	0.0288943631574158	0.0161861329540856	ACADM/NR3C1	2
BP	GO:0010656	negative regulation of muscle cell apoptotic process	2/31	53/18903	0.0034046850909155	0.0288943631574158	0.0161861329540856	APOH/NFE2L2	2
BP	GO:0006109	regulation of carbohydrate metabolic process	3/31	186/18903	0.00344052206716547	0.0288943631574158	0.0161861329540856	ACADM/NR3C1/SRC	3
BP	GO:0009266	response to temperature stimulus	3/31	186/18903	0.00344052206716547	0.0288943631574158	0.0161861329540856	ACADM/HSPA1A/GLRX2	3
BP	GO:0044282	small molecule catabolic process	4/31	385/18903	0.00345057322343633	0.0288943631574158	0.0161861329540856	ACADL/ACADM/BCKDHB/PAH	4
BP	GO:0031113	regulation of microtubule polymerization	2/31	54/18903	0.00353203451947425	0.0291235670324627	0.0163145290836313	HSPA1A/CDKN1B	2
BP	GO:1904031	positive regulation of cyclin-dependent protein kinase activity	2/31	54/18903	0.00353203451947425	0.0291235670324627	0.0163145290836313	SRC/CDKN1B	2
BP	GO:0006006	glucose metabolic process	3/31	188/18903	0.00354547772569111	0.0291235670324627	0.0163145290836313	ACADM/NR3C1/SRC	3
BP	GO:0030308	negative regulation of cell growth	3/31	188/18903	0.00354547772569111	0.0291235670324627	0.0163145290836313	HSPA1A/SPP1/CDKN1B	3
BP	GO:0006584	catecholamine metabolic process	2/31	55/18903	0.00366158713800633	0.0293778502933066	0.0164569742604152	HPRT1/PAH	2
BP	GO:0009712	catechol-containing compound metabolic process	2/31	55/18903	0.00366158713800633	0.0293778502933066	0.0164569742604152	HPRT1/PAH	2
BP	GO:0031103	axon regeneration	2/31	55/18903	0.00366158713800633	0.0293778502933066	0.0164569742604152	MAP2K1/SPP1	2
BP	GO:0043525	positive regulation of neuron apoptotic process	2/31	55/18903	0.00366158713800633	0.0293778502933066	0.0164569742604152	NQO1/NR3C1	2
BP	GO:1903202	negative regulation of oxidative stress-induced cell death	2/31	55/18903	0.00366158713800633	0.0293778502933066	0.0164569742604152	GPX1/NFE2L2	2
BP	GO:0071900	regulation of protein serine/threonine kinase activity	4/31	395/18903	0.00378143564733088	0.0301989652391008	0.0169169489485855	MAP2K1/SRC/TLR4/CDKN1B	4
BP	GO:0061136	regulation of proteasomal protein catabolic process	3/31	194/18903	0.00387208241618854	0.0307803786540333	0.0172426468981862	HSPA1A/GPX1/NFE2L2	3
BP	GO:0035196	miRNA processing	2/31	57/18903	0.00392727359451538	0.0310759034428396	0.0174081948805655	IL6/MAP2K1	2
BP	GO:0006631	fatty acid metabolic process	4/31	400/18903	0.00395471570444689	0.0311501579459858	0.0174497909958291	ACADL/ACADM/FMO4/GPX1	4
BP	GO:0071248	cellular response to metal ion	3/31	198/18903	0.00409971329683743	0.0321454792592935	0.0180073531411328	NQO1/CDKN1B/NFE2L2	3
BP	GO:0043254	regulation of protein-containing complex assembly	4/31	410/18903	0.00431736750744275	0.0336989092775509	0.0188775583321384	HSPA1A/SRC/TLR4/CDKN1B	4
BP	GO:0002753	cytoplasmic pattern recognition receptor signaling pathway	2/31	60/18903	0.00434215043388471	0.0337396824254555	0.0189003987591568	HSPA1A/TLR4	2
BP	GO:0050727	regulation of inflammatory response	4/31	414/18903	0.00446854635089801	0.0345367627397137	0.0193469096537343	IL6/SRC/TLR4/GPX1	4
BP	GO:0070918	small regulatory ncRNA processing	2/31	61/18903	0.00448477382822948	0.0345367627397137	0.0193469096537343	IL6/MAP2K1	2
BP	GO:0031102	neuron projection regeneration	2/31	62/18903	0.00462955110681483	0.0350262090318227	0.0196210891784673	MAP2K1/SPP1	2
BP	GO:0043030	regulation of macrophage activation	2/31	62/18903	0.00462955110681483	0.0350262090318227	0.0196210891784673	IL6/TLR4	2
BP	GO:0090303	positive regulation of wound healing	2/31	62/18903	0.00462955110681483	0.0350262090318227	0.0196210891784673	APOH/NFE2L2	2
BP	GO:1904036	negative regulation of epithelial cell apoptotic process	2/31	62/18903	0.00462955110681483	0.0350262090318227	0.0196210891784673	CDKN1B/NFE2L2	2
BP	GO:0045860	positive regulation of protein kinase activity	4/31	420/18903	0.00470199318862595	0.0354189443248025	0.0198410928391571	MAP2K1/SRC/TLR4/CDKN1B	4
BP	GO:0045732	positive regulation of protein catabolic process	3/31	209/18903	0.0047672955976641	0.0355147408387188	0.0198947564240695	HSPA1A/CDKN1B/NFE2L2	3
BP	GO:0071383	cellular response to steroid hormone stimulus	3/31	209/18903	0.0047672955976641	0.0355147408387188	0.0198947564240695	HSPA1A/NR3C1/SRC	3
BP	GO:0032731	positive regulation of interleukin-1 beta production	2/31	63/18903	0.00477647528961319	0.0355147408387188	0.0198947564240695	IL6/TLR4	2
BP	GO:0002218	activation of innate immune response	2/31	64/18903	0.00492553941241735	0.0364659033751928	0.0204275815703597	SRC/TLR4	2
BP	GO:0030258	lipid modification	3/31	213/18903	0.00502542518265623	0.0369509304166539	0.0206992855057137	ACADL/ACADM/FMO4	3
BP	GO:0032613	interleukin-10 production	2/31	65/18903	0.00507673652680984	0.0369509304166539	0.0206992855057137	IL6/TLR4	2
BP	GO:0032653	regulation of interleukin-10 production	2/31	65/18903	0.00507673652680984	0.0369509304166539	0.0206992855057137	IL6/TLR4	2
BP	GO:0060760	positive regulation of response to cytokine stimulus	2/31	65/18903	0.00507673652680984	0.0369509304166539	0.0206992855057137	HSPA1A/TLR4	2
BP	GO:0042180	cellular ketone metabolic process	3/31	218/18903	0.00535980216028356	0.0387082957360961	0.0216837317990763	ACADL/FMO4/NQO1	3
BP	GO:0032102	negative regulation of response to external stimulus	4/31	436/18903	0.00536462616809951	0.0387082957360961	0.0216837317990763	APOH/SPP1/SRC/GPX1	4
BP	GO:0042776	proton motive force-driven mitochondrial ATP synthesis	2/31	67/18903	0.00538550201545685	0.0387082957360961	0.0216837317990763	SDHD/SDHC	2
BP	GO:0009152	purine ribonucleotide biosynthetic process	3/31	220/18903	0.0054972280746575	0.0393473793725485	0.0220417356302057	SDHD/HPRT1/SDHC	3
BP	GO:0071222	cellular response to lipopolysaccharide	3/31	222/18903	0.00563676794088248	0.0401794409009185	0.0225078424085695	IL6/SRC/TLR4	3
BP	GO:0070374	positive regulation of ERK1 and ERK2 cascade	3/31	223/18903	0.0057073334409543	0.0405150213401077	0.0226958288880054	MAP2K1/SRC/TLR4	3
BP	GO:0097191	extrinsic apoptotic signaling pathway	3/31	224/18903	0.00577843081291958	0.0408516112798618	0.0228843808725633	HSPA1A/SRC/GPX1	3
BP	GO:0030193	regulation of blood coagulation	2/31	70/18903	0.00586447487944631	0.0411228421424589	0.0230363198088648	APOH/NFE2L2	2
BP	GO:0032722	positive regulation of chemokine production	2/31	70/18903	0.00586447487944631	0.0411228421424589	0.0230363198088648	IL6/TLR4	2
BP	GO:0010001	glial cell differentiation	3/31	227/18903	0.00599492520726025	0.0416985725101771	0.0233588342116507	IL6/MAP2K1/TLR4	3
BP	GO:1903050	regulation of proteolysis involved in protein catabolic process	3/31	227/18903	0.00599492520726025	0.0416985725101771	0.0233588342116507	HSPA1A/GPX1/NFE2L2	3
BP	GO:2000379	positive regulation of reactive oxygen species metabolic process	2/31	71/18903	0.00602832490700613	0.0417624918256449	0.0233946407297892	TLR4/NFE2L2	2
BP	GO:0019318	hexose metabolic process	3/31	229/18903	0.00614193425956461	0.0422105043735018	0.0236456097726161	ACADM/NR3C1/SRC	3
BP	GO:0071241	cellular response to inorganic substance	3/31	229/18903	0.00614193425956461	0.0422105043735018	0.0236456097726161	NQO1/CDKN1B/NFE2L2	3
BP	GO:1900046	regulation of hemostasis	2/31	72/18903	0.00619425972679819	0.0424011826536781	0.0237524245162938	APOH/NFE2L2	2
BP	GO:0042246	tissue regeneration	2/31	73/18903	0.00636227251563276	0.0433791307884052	0.0243002545011478	CDKN1B/GPX1	2
BP	GO:0009260	ribonucleotide biosynthetic process	3/31	234/18903	0.00651889709370271	0.0436756391611256	0.0244663534705802	SDHD/HPRT1/SDHC	3
BP	GO:0009743	response to carbohydrate	3/31	234/18903	0.00651889709370271	0.0436756391611256	0.0244663534705802	NQO1/CDKN1B/GPX1	3
BP	GO:0071219	cellular response to molecule of bacterial origin	3/31	234/18903	0.00651889709370271	0.0436756391611256	0.0244663534705802	IL6/SRC/TLR4	3
BP	GO:0006801	superoxide metabolic process	2/31	74/18903	0.00653235646583792	0.0436756391611256	0.0244663534705802	NQO1/NFE2L2	2
BP	GO:0032732	positive regulation of interleukin-1 production	2/31	74/18903	0.00653235646583792	0.0436756391611256	0.0244663534705802	IL6/TLR4	2
BP	GO:0032103	positive regulation of response to external stimulus	4/31	464/18903	0.0066706987029289	0.0444283986971133	0.0248880366156827	APOH/IL6/SRC/TLR4	4
BP	GO:0050818	regulation of coagulation	2/31	75/18903	0.00670450478522968	0.0444818105943123	0.0249179570560358	APOH/NFE2L2	2
BP	GO:0046700	heterocycle catabolic process	4/31	468/18903	0.0068730886058777	0.0449461210320705	0.0251780559008029	HSPA1A/IL6/HPRT1/NFE2L2	4
BP	GO:0006635	fatty acid beta-oxidation	2/31	76/18903	0.0068787106970821	0.0449461210320705	0.0251780559008029	ACADL/ACADM	2
BP	GO:0006809	nitric oxide biosynthetic process	2/31	76/18903	0.0068787106970821	0.0449461210320705	0.0251780559008029	NQO1/TLR4	2
BP	GO:0015986	proton motive force-driven ATP synthesis	2/31	76/18903	0.0068787106970821	0.0449461210320705	0.0251780559008029	SDHD/SDHC	2
BP	GO:0045088	regulation of innate immune response	3/31	240/18903	0.00698920125907448	0.0451662687438308	0.0253013789210292	SRC/TLR4/NFE2L2	3
BP	GO:0002534	cytokine production involved in inflammatory response	2/31	77/18903	0.00705496744009737	0.0451662687438308	0.0253013789210292	IL6/TLR4	2
BP	GO:1900015	regulation of cytokine production involved in inflammatory response	2/31	77/18903	0.00705496744009737	0.0451662687438308	0.0253013789210292	IL6/TLR4	2
BP	GO:1903036	positive regulation of response to wounding	2/31	77/18903	0.00705496744009737	0.0451662687438308	0.0253013789210292	APOH/NFE2L2	2
BP	GO:0042445	hormone metabolic process	3/31	241/18903	0.00706950293381699	0.0451662687438308	0.0253013789210292	BCHE/NR3C1/SPP1	3
BP	GO:0046390	ribose phosphate biosynthetic process	3/31	241/18903	0.00706950293381699	0.0451662687438308	0.0253013789210292	SDHD/HPRT1/SDHC	3
BP	GO:0006164	purine nucleotide biosynthetic process	3/31	242/18903	0.00715035509824564	0.0455142529316373	0.0254963137704001	SDHD/HPRT1/SDHC	3
BP	GO:0044270	cellular nitrogen compound catabolic process	4/31	474/18903	0.00718429658580505	0.0455621750386534	0.0255231589232548	ACADL/HSPA1A/IL6/HPRT1	4
BP	GO:0043154	negative regulation of cysteine-type endopeptidase activity involved in apoptotic process	2/31	78/18903	0.00723326826837604	0.0457047170803981	0.0256030085612848	SRC/GPX1	2
BP	GO:0002437	inflammatory response to antigenic stimulus	2/31	79/18903	0.00741360645138734	0.0465035313768842	0.0260504908033438	SRC/GPX1	2
BP	GO:0002720	positive regulation of cytokine production involved in immune response	2/31	79/18903	0.00741360645138734	0.0465035313768842	0.0260504908033438	IL6/TLR4	2
BP	GO:0005996	monosaccharide metabolic process	3/31	248/18903	0.00764708110886525	0.0477942569304078	0.0267735334017479	ACADM/NR3C1/SRC	3
BP	GO:0045926	negative regulation of growth	3/31	249/18903	0.0077318128953936	0.0481493763341298	0.0269724652782494	HSPA1A/SPP1/CDKN1B	3
BP	GO:0009636	response to toxic substance	3/31	250/18903	0.00781710255544921	0.0482666540295026	0.0270381622572591	NQO1/GPX1/NFE2L2	3
BP	GO:0016485	protein processing	3/31	250/18903	0.00781710255544921	0.0482666540295026	0.0270381622572591	APOH/BCHE/SRC	3
BP	GO:0001819	positive regulation of cytokine production	4/31	486/18903	0.00783458732073085	0.0482666540295026	0.0270381622572591	HSPA1A/IL6/SRC/TLR4	4
BP	GO:0072522	purine-containing compound biosynthetic process	3/31	251/18903	0.00790295097463328	0.0485145566948129	0.0271770331324718	SDHD/HPRT1/SDHC	3
BP	GO:0046209	nitric oxide metabolic process	2/31	82/18903	0.00796677805341473	0.0485607496188707	0.0272029096263148	NQO1/TLR4	2
BP	GO:1905897	regulation of response to endoplasmic reticulum stress	2/31	82/18903	0.00796677805341473	0.0485607496188707	0.0272029096263148	HSPA1A/NFE2L2	2
BP	GO:0019439	aromatic compound catabolic process	4/31	489/18903	0.008003051775724	0.0486100856095912	0.0272305468128786	HSPA1A/IL6/HPRT1/PAH	4
BP	GO:0006094	gluconeogenesis	2/31	83/18903	0.00815519865638241	0.0491288504168178	0.0275211500733112	ACADM/NR3C1	2
BP	GO:2001057	reactive nitrogen species metabolic process	2/31	83/18903	0.00815519865638241	0.0491288504168178	0.0275211500733112	NQO1/TLR4	2
BP	GO:0001667	ameboidal-type cell migration	4/31	492/18903	0.00817390148963867	0.0491288504168178	0.0275211500733112	APOH/SRC/GPX1/NFE2L2	4
BP	GO:0051402	neuron apoptotic process	3/31	255/18903	0.00825194966782953	0.0494257401979373	0.0276874627012701	NQO1/NR3C1/GPX1	3
BP	GO:0033674	positive regulation of kinase activity	4/31	496/18903	0.00840543583875163	0.0499978511098157	0.0280079495461851	MAP2K1/SRC/TLR4/CDKN1B	4
BP	GO:0043410	positive regulation of MAPK cascade	4/31	496/18903	0.00840543583875163	0.0499978511098157	0.0280079495461851	IL6/MAP2K1/SRC/TLR4	4
BP	GO:0044089	positive regulation of cellular component biogenesis	4/31	498/18903	0.00852281292221373	0.0502666472907893	0.0281585246150691	HSPA1A/SRC/TLR4/CDKN1B	4
BP	GO:0021954	central nervous system neuron development	2/31	85/18903	0.00853804501808768	0.0502666472907893	0.0281585246150691	HPRT1/OGDH	2
BP	GO:0046785	microtubule polymerization	2/31	85/18903	0.00853804501808768	0.0502666472907893	0.0281585246150691	HSPA1A/CDKN1B	2
BP	GO:0019319	hexose biosynthetic process	2/31	86/18903	0.0087324575141053	0.0512363578633729	0.0287017400571023	ACADM/NR3C1	2
BP	GO:0071216	cellular response to biotic stimulus	3/31	261/18903	0.00879235591482725	0.0514129286544983	0.0288006520243048	IL6/SRC/TLR4	3
BP	GO:0010660	regulation of muscle cell apoptotic process	2/31	87/18903	0.00892885407032659	0.0518595059640181	0.0290508170709191	APOH/NFE2L2	2
BP	GO:0031110	regulation of microtubule polymerization or depolymerization	2/31	87/18903	0.00892885407032659	0.0518595059640181	0.0290508170709191	HSPA1A/CDKN1B	2
BP	GO:0002312	B cell activation involved in immune response	2/31	88/18903	0.0091272280932082	0.0528337867811549	0.02959659268656	IL6/TLR4	2
BP	GO:0051091	positive regulation of DNA-binding transcription factor activity	3/31	266/18903	0.00925830567521347	0.0534133019723854	0.0299212272833866	HSPA1A/IL6/TLR4	3
BP	GO:0048678	response to axon injury	2/31	89/18903	0.00932757300428072	0.0534553602404792	0.0299447876129732	MAP2K1/SPP1	2
BP	GO:0050829	defense response to Gram-negative bacterium	2/31	89/18903	0.00932757300428072	0.0534553602404792	0.0299447876129732	IL6/TLR4	2
BP	GO:0046364	monosaccharide biosynthetic process	2/31	90/18903	0.0095298822401195	0.0544339300139276	0.0304929658293123	ACADM/NR3C1	2
BP	GO:2000117	negative regulation of cysteine-type endopeptidase activity	2/31	91/18903	0.00973414925231559	0.0552598689357105	0.030955642827144	SRC/GPX1	2
BP	GO:0071560	cellular response to transforming growth factor beta stimulus	3/31	271/18903	0.00973855081533681	0.0552598689357105	0.030955642827144	HSPA1A/NR3C1/SRC	3
BP	GO:0010657	muscle cell apoptotic process	2/31	92/18903	0.00994036750744661	0.0560363854586451	0.0313906342340419	APOH/NFE2L2	2
BP	GO:0032273	positive regulation of protein polymerization	2/31	92/18903	0.00994036750744661	0.0560363854586451	0.0313906342340419	HSPA1A/CDKN1B	2
BP	GO:1904705	regulation of vascular associated smooth muscle cell proliferation	2/31	93/18903	0.0101485304870477	0.0570235019223363	0.0319436001615284	SRC/CDKN1B	2
BP	GO:0071559	response to transforming growth factor beta	3/31	277/18903	0.0103338437962947	0.0576407731002576	0.032289385022753	HSPA1A/NR3C1/SRC	3
BP	GO:0032436	positive regulation of proteasomal ubiquitin-dependent protein catabolic process	2/31	94/18903	0.0103586316875825	0.0576407731002576	0.032289385022753	HSPA1A/NFE2L2	2
BP	GO:1903035	negative regulation of response to wounding	2/31	94/18903	0.0103586316875825	0.0576407731002576	0.032289385022753	APOH/SPP1	2
BP	GO:1990874	vascular associated smooth muscle cell proliferation	2/31	95/18903	0.0105706646204145	0.0586314999042281	0.0328443734017278	SRC/CDKN1B	2
BP	GO:0043542	endothelial cell migration	3/31	281/18903	0.0107422896439249	0.0593924667813157	0.0332706541603343	APOH/GPX1/NFE2L2	3
BP	GO:0019217	regulation of fatty acid metabolic process	2/31	96/18903	0.0107846228117776	0.0594360202885508	0.0332950520975681	ACADL/FMO4	2
BP	GO:0006576	cellular biogenic amine metabolic process	2/31	97/18903	0.011000499802748	0.0604326820373894	0.0338533651321577	HPRT1/PAH	2
BP	GO:0032642	regulation of chemokine production	2/31	98/18903	0.0112182891492147	0.0614334881980806	0.0344139997960873	IL6/TLR4	2
BP	GO:0032602	chemokine production	2/31	99/18903	0.0114379844218513	0.0620456702128728	0.034756933794305	IL6/TLR4	2
BP	GO:0032755	positive regulation of interleukin-6 production	2/31	99/18903	0.0114379844218513	0.0620456702128728	0.034756933794305	IL6/TLR4	2
BP	GO:0043279	response to alkaloid	2/31	99/18903	0.0114379844218513	0.0620456702128728	0.034756933794305	BCHE/NQO1	2
BP	GO:0002532	production of molecular mediator involved in inflammatory response	2/31	100/18903	0.0116595792060872	0.0626566172289732	0.0350991759671685	IL6/TLR4	2
BP	GO:0030316	osteoclast differentiation	2/31	100/18903	0.0116595792060872	0.0626566172289732	0.0350991759671685	SRC/TLR4	2
BP	GO:0034620	cellular response to unfolded protein	2/31	100/18903	0.0116595792060872	0.0626566172289732	0.0350991759671685	HSPA1A/NFE2L2	2
BP	GO:0009062	fatty acid catabolic process	2/31	101/18903	0.0118830671020786	0.0634292725172046	0.0355320043757705	ACADL/ACADM	2
BP	GO:0021549	cerebellum development	2/31	101/18903	0.0118830671020786	0.0634292725172046	0.0355320043757705	MAP2K1/OGDH	2
BP	GO:0010632	regulation of epithelial cell migration	3/31	292/18903	0.0119136720554054	0.0634292725172046	0.0355320043757705	APOH/SRC/NFE2L2	3
BP	GO:0019218	regulation of steroid metabolic process	2/31	102/18903	0.0121084417246806	0.0642678830002276	0.0360017797676332	ACADL/NR3C1	2
BP	GO:0043255	regulation of carbohydrate biosynthetic process	2/31	103/18903	0.0123356967034179	0.0651873527262909	0.036516851138206	ACADM/NR3C1	2
BP	GO:0044262	cellular carbohydrate metabolic process	3/31	296/18903	0.012357254690723	0.0651873527262909	0.036516851138206	ACADM/NR3C1/SRC	3
BP	GO:0006641	triglyceride metabolic process	2/31	104/18903	0.0125648256824571	0.0660802570190196	0.0370170410028742	APOH/GPX1	2
BP	GO:0032760	positive regulation of tumor necrosis factor production	2/31	105/18903	0.0127958223205775	0.067090557759867	0.0375829943698294	IL6/TLR4	2
BP	GO:0006754	ATP biosynthetic process	2/31	106/18903	0.0130286802911435	0.0681044651582503	0.0381509681252624	SDHD/SDHC	2
BP	GO:0062207	regulation of pattern recognition receptor signaling pathway	2/31	107/18903	0.0132633932820756	0.0689370070181349	0.0386173439772069	HSPA1A/TLR4	2
BP	GO:0009165	nucleotide biosynthetic process	3/31	304/18903	0.0132728236462244	0.0689370070181349	0.0386173439772069	SDHD/HPRT1/SDHC	3
BP	GO:0046651	lymphocyte proliferation	3/31	305/18903	0.0133899425511652	0.0689370070181349	0.0386173439772069	IL6/TLR4/HPRT1	3
BP	GO:0008637	apoptotic mitochondrial changes	2/31	108/18903	0.0134999549958224	0.0689370070181349	0.0386173439772069	HSPA1A/GPX1	2
BP	GO:0044106	cellular amine metabolic process	2/31	108/18903	0.0134999549958224	0.0689370070181349	0.0386173439772069	HPRT1/PAH	2
BP	GO:0062014	negative regulation of small molecule metabolic process	2/31	108/18903	0.0134999549958224	0.0689370070181349	0.0386173439772069	ACADL/FMO4	2
BP	GO:0090398	cellular senescence	2/31	108/18903	0.0134999549958224	0.0689370070181349	0.0386173439772069	MAP2K1/CDKN1B	2
BP	GO:1901293	nucleoside phosphate biosynthetic process	3/31	306/18903	0.0135076570273215	0.0689370070181349	0.0386173439772069	SDHD/HPRT1/SDHC	3
BP	GO:0031349	positive regulation of defense response	3/31	307/18903	0.0136259675416394	0.069131747086259	0.0387264340657121	IL6/SRC/TLR4	3
BP	GO:0044403	biological process involved in symbiotic interaction	3/31	307/18903	0.0136259675416394	0.069131747086259	0.0387264340657121	HSPA1A/SRC/GPX1	3
BP	GO:0042116	macrophage activation	2/31	109/18903	0.0137383591493324	0.0692943553584747	0.0388175244662577	IL6/TLR4	2
BP	GO:1903557	positive regulation of tumor necrosis factor superfamily cytokine production	2/31	109/18903	0.0137383591493324	0.0692943553584747	0.0388175244662577	IL6/TLR4	2
BP	GO:0045833	negative regulation of lipid metabolic process	2/31	110/18903	0.0139785994740258	0.0699164446215218	0.039166008337182	ACADL/FMO4	2
BP	GO:2000060	positive regulation of ubiquitin-dependent protein catabolic process	2/31	110/18903	0.0139785994740258	0.0699164446215218	0.039166008337182	HSPA1A/NFE2L2	2
BP	GO:0042063	gliogenesis	3/31	310/18903	0.013984479881951	0.0699164446215218	0.039166008337182	IL6/MAP2K1/TLR4	3
BP	GO:0001676	long-chain fatty acid metabolic process	2/31	111/18903	0.0142206697157662	0.0699164446215218	0.039166008337182	ACADL/GPX1	2
BP	GO:0018958	phenol-containing compound metabolic process	2/31	111/18903	0.0142206697157662	0.0699164446215218	0.039166008337182	HPRT1/PAH	2
BP	GO:0022037	metencephalon development	2/31	111/18903	0.0142206697157662	0.0699164446215218	0.039166008337182	MAP2K1/OGDH	2
BP	GO:0032611	interleukin-1 beta production	2/31	111/18903	0.0142206697157662	0.0699164446215218	0.039166008337182	IL6/TLR4	2
BP	GO:0032651	regulation of interleukin-1 beta production	2/31	111/18903	0.0142206697157662	0.0699164446215218	0.039166008337182	IL6/TLR4	2
BP	GO:0032943	mononuclear cell proliferation	3/31	312/18903	0.0142264765577705	0.0699164446215218	0.039166008337182	IL6/TLR4/HPRT1	3
BP	GO:0070372	regulation of ERK1 and ERK2 cascade	3/31	315/18903	0.0145939628479075	0.0715187099790922	0.0400635702583107	MAP2K1/SRC/TLR4	3
BP	GO:0002456	T cell mediated immunity	2/31	113/18903	0.0147102750058925	0.071681424816849	0.0401547203550678	IL6/HPRT1	2
BP	GO:0009063	cellular amino acid catabolic process	2/31	113/18903	0.0147102750058925	0.071681424816849	0.0401547203550678	BCKDHB/PAH	2
BP	GO:0048640	negative regulation of developmental growth	2/31	115/18903	0.0152071252744254	0.0723386138949647	0.040522866548026	SPP1/CDKN1B	2
BP	GO:0030518	intracellular steroid hormone receptor signaling pathway	2/31	116/18903	0.0154582517929174	0.0723386138949647	0.040522866548026	NR3C1/SRC	2
BP	GO:0008202	steroid metabolic process	3/31	323/18903	0.0156003521144928	0.0723386138949647	0.040522866548026	ACADL/NR3C1/SPP1	3
BP	GO:0000079	regulation of cyclin-dependent protein serine/threonine kinase activity	2/31	117/18903	0.0157111710053835	0.0723386138949647	0.040522866548026	SRC/CDKN1B	2
BP	GO:0009206	purine ribonucleoside triphosphate biosynthetic process	2/31	117/18903	0.0157111710053835	0.0723386138949647	0.040522866548026	SDHD/SDHC	2
BP	GO:0009308	amine metabolic process	2/31	117/18903	0.0157111710053835	0.0723386138949647	0.040522866548026	HPRT1/PAH	2
BP	GO:0021782	glial cell development	2/31	117/18903	0.0157111710053835	0.0723386138949647	0.040522866548026	IL6/TLR4	2
BP	GO:0043406	positive regulation of MAP kinase activity	2/31	117/18903	0.0157111710053835	0.0723386138949647	0.040522866548026	SRC/TLR4	2
BP	GO:1901214	regulation of neuron death	3/31	325/18903	0.0158579717480963	0.0723386138949647	0.040522866548026	NQO1/NR3C1/TLR4	3
BP	GO:0002718	regulation of cytokine production involved in immune response	2/31	118/18903	0.0159658767580087	0.0723386138949647	0.040522866548026	IL6/TLR4	2
BP	GO:0009145	purine nucleoside triphosphate biosynthetic process	2/31	118/18903	0.0159658767580087	0.0723386138949647	0.040522866548026	SDHD/SDHC	2
BP	GO:0043200	response to amino acid	2/31	118/18903	0.0159658767580087	0.0723386138949647	0.040522866548026	NQO1/CDKN1B	2
BP	GO:1901800	positive regulation of proteasomal protein catabolic process	2/31	118/18903	0.0159658767580087	0.0723386138949647	0.040522866548026	HSPA1A/NFE2L2	2
BP	GO:0071496	cellular response to external stimulus	3/31	328/18903	0.0162489294398064	0.0723386138949647	0.040522866548026	TLR4/NFE2L2/GLRX2	3
BP	GO:0009113	purine nucleobase biosynthetic process	1/31	10/18903	0.0162828643024965	0.0723386138949647	0.040522866548026	HPRT1	1
BP	GO:0009128	purine nucleoside monophosphate catabolic process	1/31	10/18903	0.0162828643024965	0.0723386138949647	0.040522866548026	HPRT1	1
BP	GO:0009169	purine ribonucleoside monophosphate catabolic process	1/31	10/18903	0.0162828643024965	0.0723386138949647	0.040522866548026	HPRT1	1
BP	GO:0010572	positive regulation of platelet activation	1/31	10/18903	0.0162828643024965	0.0723386138949647	0.040522866548026	TLR4	1
BP	GO:0032261	purine nucleotide salvage	1/31	10/18903	0.0162828643024965	0.0723386138949647	0.040522866548026	HPRT1	1
BP	GO:0036093	germ cell proliferation	1/31	10/18903	0.0162828643024965	0.0723386138949647	0.040522866548026	SRC	1
BP	GO:0042135	neurotransmitter catabolic process	1/31	10/18903	0.0162828643024965	0.0723386138949647	0.040522866548026	BCHE	1
BP	GO:0048671	negative regulation of collateral sprouting	1/31	10/18903	0.0162828643024965	0.0723386138949647	0.040522866548026	SPP1	1
BP	GO:0051006	positive regulation of lipoprotein lipase activity	1/31	10/18903	0.0162828643024965	0.0723386138949647	0.040522866548026	APOH	1
BP	GO:0051974	negative regulation of telomerase activity	1/31	10/18903	0.0162828643024965	0.0723386138949647	0.040522866548026	SRC	1
BP	GO:0060502	epithelial cell proliferation involved in lung morphogenesis	1/31	10/18903	0.0162828643024965	0.0723386138949647	0.040522866548026	MAP2K1	1
BP	GO:0060768	regulation of epithelial cell proliferation involved in prostate gland development	1/31	10/18903	0.0162828643024965	0.0723386138949647	0.040522866548026	CDKN1B	1
BP	GO:0070091	glucagon secretion	1/31	10/18903	0.0162828643024965	0.0723386138949647	0.040522866548026	IL6	1
BP	GO:0070092	regulation of glucagon secretion	1/31	10/18903	0.0162828643024965	0.0723386138949647	0.040522866548026	IL6	1
BP	GO:0070391	response to lipoteichoic acid	1/31	10/18903	0.0162828643024965	0.0723386138949647	0.040522866548026	TLR4	1
BP	GO:0071223	cellular response to lipoteichoic acid	1/31	10/18903	0.0162828643024965	0.0723386138949647	0.040522866548026	TLR4	1
BP	GO:0097050	type B pancreatic cell apoptotic process	1/31	10/18903	0.0162828643024965	0.0723386138949647	0.040522866548026	IL6	1
BP	GO:0098976	excitatory chemical synaptic transmission	1/31	10/18903	0.0162828643024965	0.0723386138949647	0.040522866548026	PVALB	1
BP	GO:2000121	regulation of removal of superoxide radicals	1/31	10/18903	0.0162828643024965	0.0723386138949647	0.040522866548026	NFE2L2	1
BP	GO:2000659	regulation of interleukin-1-mediated signaling pathway	1/31	10/18903	0.0162828643024965	0.0723386138949647	0.040522866548026	IL6	1
BP	GO:0002367	cytokine production involved in immune response	2/31	120/18903	0.0164806233395485	0.0723386138949647	0.040522866548026	IL6/TLR4	2
BP	GO:0007006	mitochondrial membrane organization	2/31	120/18903	0.0164806233395485	0.0723386138949647	0.040522866548026	HSPA1A/IMMT	2
BP	GO:0035967	cellular response to topologically incorrect protein	2/31	120/18903	0.0164806233395485	0.0723386138949647	0.040522866548026	HSPA1A/NFE2L2	2
BP	GO:0051897	positive regulation of protein kinase B signaling	2/31	120/18903	0.0164806233395485	0.0723386138949647	0.040522866548026	SRC/GPX1	2
BP	GO:1904029	regulation of cyclin-dependent protein kinase activity	2/31	120/18903	0.0164806233395485	0.0723386138949647	0.040522866548026	SRC/CDKN1B	2
BP	GO:0009201	ribonucleoside triphosphate biosynthetic process	2/31	123/18903	0.0172659892338527	0.0728119506260074	0.0407880217694431	SDHD/SDHC	2
BP	GO:0016042	lipid catabolic process	3/31	336/18903	0.0173181101603702	0.0728119506260074	0.0407880217694431	ACADL/ACADM/SPP1	3
BP	GO:0051604	protein maturation	3/31	336/18903	0.0173181101603702	0.0728119506260074	0.0407880217694431	APOH/BCHE/SRC	3
BP	GO:0031109	microtubule polymerization or depolymerization	2/31	124/18903	0.0175312857917088	0.0728119506260074	0.0407880217694431	HSPA1A/CDKN1B	2
BP	GO:0032496	response to lipopolysaccharide	3/31	339/18903	0.0177290608193109	0.0728119506260074	0.0407880217694431	IL6/SRC/TLR4	3
BP	GO:0070371	ERK1 and ERK2 cascade	3/31	340/18903	0.0178672596366101	0.0728119506260074	0.0407880217694431	MAP2K1/SRC/TLR4	3
BP	GO:0006188	IMP biosynthetic process	1/31	11/18903	0.0178969664147404	0.0728119506260074	0.0407880217694431	HPRT1	1
BP	GO:0010968	regulation of microtubule nucleation	1/31	11/18903	0.0178969664147404	0.0728119506260074	0.0407880217694431	HSPA1A	1
BP	GO:0019372	lipoxygenase pathway	1/31	11/18903	0.0178969664147404	0.0728119506260074	0.0407880217694431	GPX1	1
BP	GO:0021860	pyramidal neuron development	1/31	11/18903	0.0178969664147404	0.0728119506260074	0.0407880217694431	OGDH	1
BP	GO:0031943	regulation of glucocorticoid metabolic process	1/31	11/18903	0.0178969664147404	0.0728119506260074	0.0407880217694431	NR3C1	1
BP	GO:0033625	positive regulation of integrin activation	1/31	11/18903	0.0178969664147404	0.0728119506260074	0.0407880217694431	SRC	1
BP	GO:0042451	purine nucleoside biosynthetic process	1/31	11/18903	0.0178969664147404	0.0728119506260074	0.0407880217694431	HPRT1	1
BP	GO:0042455	ribonucleoside biosynthetic process	1/31	11/18903	0.0178969664147404	0.0728119506260074	0.0407880217694431	HPRT1	1
BP	GO:0042762	regulation of sulfur metabolic process	1/31	11/18903	0.0178969664147404	0.0728119506260074	0.0407880217694431	NFE2L2	1
BP	GO:0046129	purine ribonucleoside biosynthetic process	1/31	11/18903	0.0178969664147404	0.0728119506260074	0.0407880217694431	HPRT1	1
BP	GO:0060020	Bergmann glial cell differentiation	1/31	11/18903	0.0178969664147404	0.0728119506260074	0.0407880217694431	MAP2K1	1
BP	GO:0060439	trachea morphogenesis	1/31	11/18903	0.0178969664147404	0.0728119506260074	0.0407880217694431	MAP2K1	1
BP	GO:0060767	epithelial cell proliferation involved in prostate gland development	1/31	11/18903	0.0178969664147404	0.0728119506260074	0.0407880217694431	CDKN1B	1
BP	GO:0061365	positive regulation of triglyceride lipase activity	1/31	11/18903	0.0178969664147404	0.0728119506260074	0.0407880217694431	APOH	1
BP	GO:0061418	regulation of transcription from RNA polymerase II promoter in response to hypoxia	1/31	11/18903	0.0178969664147404	0.0728119506260074	0.0407880217694431	NFE2L2	1
BP	GO:0071394	cellular response to testosterone stimulus	1/31	11/18903	0.0178969664147404	0.0728119506260074	0.0407880217694431	SPP1	1
BP	GO:0071803	positive regulation of podosome assembly	1/31	11/18903	0.0178969664147404	0.0728119506260074	0.0407880217694431	SRC	1
BP	GO:0072584	caveolin-mediated endocytosis	1/31	11/18903	0.0178969664147404	0.0728119506260074	0.0407880217694431	SRC	1
BP	GO:0090084	negative regulation of inclusion body assembly	1/31	11/18903	0.0178969664147404	0.0728119506260074	0.0407880217694431	HSPA1A	1
BP	GO:1901731	positive regulation of platelet aggregation	1/31	11/18903	0.0178969664147404	0.0728119506260074	0.0407880217694431	IL6	1
BP	GO:1902510	regulation of apoptotic DNA fragmentation	1/31	11/18903	0.0178969664147404	0.0728119506260074	0.0407880217694431	IL6	1
BP	GO:1904464	regulation of matrix metallopeptidase secretion	1/31	11/18903	0.0178969664147404	0.0728119506260074	0.0407880217694431	TLR4	1
BP	GO:1990773	matrix metallopeptidase secretion	1/31	11/18903	0.0178969664147404	0.0728119506260074	0.0407880217694431	TLR4	1
BP	GO:2000392	regulation of lamellipodium morphogenesis	1/31	11/18903	0.0178969664147404	0.0728119506260074	0.0407880217694431	SRC	1
BP	GO:2000833	positive regulation of steroid hormone secretion	1/31	11/18903	0.0178969664147404	0.0728119506260074	0.0407880217694431	SPP1	1
BP	GO:0072329	monocarboxylic acid catabolic process	2/31	126/18903	0.0180671044468081	0.0733311886370447	0.0410788901106374	ACADL/ACADM	2
BP	GO:0070661	leukocyte proliferation	3/31	348/18903	0.0189947599795594	0.0769154013256808	0.0430867053650495	IL6/TLR4/HPRT1	3
BP	GO:0045765	regulation of angiogenesis	3/31	349/18903	0.0191384396109511	0.0770398480768379	0.0431564183277115	APOH/IL6/NFE2L2	3
BP	GO:0032612	interleukin-1 production	2/31	130/18903	0.0191594752608484	0.0770398480768379	0.0431564183277115	IL6/TLR4	2
BP	GO:0032652	regulation of interleukin-1 production	2/31	130/18903	0.0191594752608484	0.0770398480768379	0.0431564183277115	IL6/TLR4	2
BP	GO:0021794	thalamus development	1/31	12/18903	0.019508505375207	0.0771838802115414	0.0432371026905843	OGDH	1
BP	GO:0032490	detection of molecule of bacterial origin	1/31	12/18903	0.019508505375207	0.0771838802115414	0.0432371026905843	TLR4	1
BP	GO:0032966	negative regulation of collagen biosynthetic process	1/31	12/18903	0.019508505375207	0.0771838802115414	0.0432371026905843	IL6	1
BP	GO:0042447	hormone catabolic process	1/31	12/18903	0.019508505375207	0.0771838802115414	0.0432371026905843	SPP1	1
BP	GO:0042711	maternal behavior	1/31	12/18903	0.019508505375207	0.0771838802115414	0.0432371026905843	NR3C1	1
BP	GO:0140052	cellular response to oxidised low-density lipoprotein particle stimulus	1/31	12/18903	0.019508505375207	0.0771838802115414	0.0432371026905843	TLR4	1
BP	GO:1900227	positive regulation of NLRP3 inflammasome complex assembly	1/31	12/18903	0.019508505375207	0.0771838802115414	0.0432371026905843	TLR4	1
BP	GO:0031346	positive regulation of cell projection organization	3/31	352/18903	0.0195731395489774	0.0772623929564897	0.0432810842007979	MAP2K1/SRC/NFE2L2	3
BP	GO:0006639	acylglycerol metabolic process	2/31	132/18903	0.0197159315482795	0.0776483605497307	0.0434972967106958	APOH/GPX1	2
BP	GO:0001101	response to acid chemical	2/31	133/18903	0.0199967065495973	0.0781063409914215	0.0437538495988558	NQO1/CDKN1B	2
BP	GO:0002702	positive regulation of production of molecular mediator of immune response	2/31	133/18903	0.0199967065495973	0.0781063409914215	0.0437538495988558	IL6/TLR4	2
BP	GO:0006638	neutral lipid metabolic process	2/31	133/18903	0.0199967065495973	0.0781063409914215	0.0437538495988558	APOH/GPX1	2
BP	GO:1901342	regulation of vasculature development	3/31	355/18903	0.0200133349091063	0.0781063409914215	0.0437538495988558	APOH/IL6/NFE2L2	3
BP	GO:0009142	nucleoside triphosphate biosynthetic process	2/31	134/18903	0.0202791715452624	0.0784101436141835	0.0439240346836433	SDHD/SDHC	2
BP	GO:0002237	response to molecule of bacterial origin	3/31	360/18903	0.0207592181097124	0.0784101436141835	0.0439240346836433	IL6/SRC/TLR4	3
BP	GO:0010038	response to metal ion	3/31	360/18903	0.0207592181097124	0.0784101436141835	0.0439240346836433	NQO1/CDKN1B/NFE2L2	3
BP	GO:0010565	regulation of cellular ketone metabolic process	2/31	136/18903	0.020849147870169	0.0784101436141835	0.0439240346836433	ACADL/FMO4	2
BP	GO:0043401	steroid hormone mediated signaling pathway	2/31	136/18903	0.020849147870169	0.0784101436141835	0.0439240346836433	NR3C1/SRC	2
BP	GO:1903052	positive regulation of proteolysis involved in protein catabolic process	2/31	136/18903	0.020849147870169	0.0784101436141835	0.0439240346836433	HSPA1A/NFE2L2	2
BP	GO:0002831	regulation of response to biotic stimulus	3/31	361/18903	0.0209102297376381	0.0784101436141835	0.0439240346836433	SRC/TLR4/NFE2L2	3
BP	GO:0009650	UV protection	1/31	13/18903	0.0211174851186497	0.0784101436141835	0.0439240346836433	GPX1	1
BP	GO:0010713	negative regulation of collagen metabolic process	1/31	13/18903	0.0211174851186497	0.0784101436141835	0.0439240346836433	IL6	1
BP	GO:0032494	response to peptidoglycan	1/31	13/18903	0.0211174851186497	0.0784101436141835	0.0439240346836433	IL6	1
BP	GO:0034616	response to laminar fluid shear stress	1/31	13/18903	0.0211174851186497	0.0784101436141835	0.0439240346836433	NFE2L2	1
BP	GO:0035745	T-helper 2 cell cytokine production	1/31	13/18903	0.0211174851186497	0.0784101436141835	0.0439240346836433	IL6	1
BP	GO:0036006	cellular response to macrophage colony-stimulating factor stimulus	1/31	13/18903	0.0211174851186497	0.0784101436141835	0.0439240346836433	TLR4	1
BP	GO:0042921	glucocorticoid receptor signaling pathway	1/31	13/18903	0.0211174851186497	0.0784101436141835	0.0439240346836433	NR3C1	1
BP	GO:0051775	response to redox state	1/31	13/18903	0.0211174851186497	0.0784101436141835	0.0439240346836433	GLRX2	1
BP	GO:0051918	negative regulation of fibrinolysis	1/31	13/18903	0.0211174851186497	0.0784101436141835	0.0439240346836433	APOH	1
BP	GO:0060746	parental behavior	1/31	13/18903	0.0211174851186497	0.0784101436141835	0.0439240346836433	NR3C1	1
BP	GO:0071285	cellular response to lithium ion	1/31	13/18903	0.0211174851186497	0.0784101436141835	0.0439240346836433	CDKN1B	1
BP	GO:1901029	negative regulation of mitochondrial outer membrane permeabilization involved in apoptotic signaling pathway	1/31	13/18903	0.0211174851186497	0.0784101436141835	0.0439240346836433	HSPA1A	1
BP	GO:1903265	positive regulation of tumor necrosis factor-mediated signaling pathway	1/31	13/18903	0.0211174851186497	0.0784101436141835	0.0439240346836433	HSPA1A	1
BP	GO:1903624	regulation of DNA catabolic process	1/31	13/18903	0.0211174851186497	0.0784101436141835	0.0439240346836433	IL6	1
BP	GO:2000551	regulation of T-helper 2 cell cytokine production	1/31	13/18903	0.0211174851186497	0.0784101436141835	0.0439240346836433	IL6	1
BP	GO:0061041	regulation of wound healing	2/31	137/18903	0.0211366474090408	0.0784101436141835	0.0439240346836433	APOH/NFE2L2	2
BP	GO:0010639	negative regulation of organelle organization	3/31	366/18903	0.0216744699846898	0.0801601708283001	0.0449043702946633	HSPA1A/SRC/GPX1	3
BP	GO:0001889	liver development	2/31	141/18903	0.0223032511588565	0.0801601708283001	0.0449043702946633	ACADM/IL6	2
BP	GO:0006986	response to unfolded protein	2/31	141/18903	0.0223032511588565	0.0801601708283001	0.0449043702946633	HSPA1A/NFE2L2	2
BP	GO:0032434	regulation of proteasomal ubiquitin-dependent protein catabolic process	2/31	141/18903	0.0223032511588565	0.0801601708283001	0.0449043702946633	HSPA1A/NFE2L2	2
BP	GO:0070555	response to interleukin-1	2/31	141/18903	0.0223032511588565	0.0801601708283001	0.0449043702946633	IL6/SRC	2
BP	GO:0045862	positive regulation of proteolysis	3/31	372/18903	0.0226117730570376	0.0801601708283001	0.0449043702946633	HSPA1A/SRC/NFE2L2	3
BP	GO:0002756	MyD88-independent toll-like receptor signaling pathway	1/31	14/18903	0.0227239095739867	0.0801601708283001	0.0449043702946633	TLR4	1
BP	GO:0006167	AMP biosynthetic process	1/31	14/18903	0.0227239095739867	0.0801601708283001	0.0449043702946633	HPRT1	1
BP	GO:0006177	GMP biosynthetic process	1/31	14/18903	0.0227239095739867	0.0801601708283001	0.0449043702946633	HPRT1	1
BP	GO:0009158	ribonucleoside monophosphate catabolic process	1/31	14/18903	0.0227239095739867	0.0801601708283001	0.0449043702946633	HPRT1	1
BP	GO:0010269	response to selenium ion	1/31	14/18903	0.0227239095739867	0.0801601708283001	0.0449043702946633	GPX1	1
BP	GO:0018158	protein oxidation	1/31	14/18903	0.0227239095739867	0.0801601708283001	0.0449043702946633	GPX1	1
BP	GO:0021859	pyramidal neuron differentiation	1/31	14/18903	0.0227239095739867	0.0801601708283001	0.0449043702946633	OGDH	1
BP	GO:0031958	corticosteroid receptor signaling pathway	1/31	14/18903	0.0227239095739867	0.0801601708283001	0.0449043702946633	NR3C1	1
BP	GO:0035791	platelet-derived growth factor receptor-beta signaling pathway	1/31	14/18903	0.0227239095739867	0.0801601708283001	0.0449043702946633	SRC	1
BP	GO:0042136	neurotransmitter biosynthetic process	1/31	14/18903	0.0227239095739867	0.0801601708283001	0.0449043702946633	PAH	1
BP	GO:0043101	purine-containing compound salvage	1/31	14/18903	0.0227239095739867	0.0801601708283001	0.0449043702946633	HPRT1	1
BP	GO:0045348	positive regulation of MHC class II biosynthetic process	1/31	14/18903	0.0227239095739867	0.0801601708283001	0.0449043702946633	TLR4	1
BP	GO:0048681	negative regulation of axon regeneration	1/31	14/18903	0.0227239095739867	0.0801601708283001	0.0449043702946633	SPP1	1
BP	GO:0071236	cellular response to antibiotic	1/31	14/18903	0.0227239095739867	0.0801601708283001	0.0449043702946633	CDKN1B	1
BP	GO:0071801	regulation of podosome assembly	1/31	14/18903	0.0227239095739867	0.0801601708283001	0.0449043702946633	SRC	1
BP	GO:0072540	T-helper 17 cell lineage commitment	1/31	14/18903	0.0227239095739867	0.0801601708283001	0.0449043702946633	IL6	1
BP	GO:1901533	negative regulation of hematopoietic progenitor cell differentiation	1/31	14/18903	0.0227239095739867	0.0801601708283001	0.0449043702946633	NFE2L2	1
BP	GO:1904294	positive regulation of ERAD pathway	1/31	14/18903	0.0227239095739867	0.0801601708283001	0.0449043702946633	NFE2L2	1
BP	GO:1901653	cellular response to peptide	3/31	373/18903	0.0227701354816621	0.0801601708283001	0.0449043702946633	SRC/TLR4/NFE2L2	3
BP	GO:0002460	adaptive immune response based on somatic recombination of immune receptors built from immunoglobulin superfamily domains	3/31	375/18903	0.0230886997518381	0.081116104016132	0.0454398678790598	IL6/TLR4/HPRT1	3
BP	GO:0061008	hepaticobiliary system development	2/31	144/18903	0.0231954765017728	0.0813256035885328	0.0455572259919287	ACADM/IL6	2
BP	GO:0050767	regulation of neurogenesis	3/31	377/18903	0.0234097169599567	0.0818805018360886	0.0458680705937632	IL6/MAP2K1/SPP1	3
BP	GO:0006352	DNA-templated transcription initiation	2/31	145/18903	0.0234961440051385	0.0818805018360886	0.0458680705937632	TFAM/POLRMT	2
BP	GO:0045089	positive regulation of innate immune response	2/31	145/18903	0.0234961440051385	0.0818805018360886	0.0458680705937632	SRC/TLR4	2
BP	GO:0050671	positive regulation of lymphocyte proliferation	2/31	146/18903	0.0237984314151871	0.0819134807468666	0.045886544821128	IL6/TLR4	2
BP	GO:0050768	negative regulation of neurogenesis	2/31	146/18903	0.0237984314151871	0.0819134807468666	0.045886544821128	IL6/SPP1	2
BP	GO:0018108	peptidyl-tyrosine phosphorylation	3/31	380/18903	0.0238958428375447	0.0819134807468666	0.045886544821128	IL6/MAP2K1/SRC	3
BP	GO:0106106	cold-induced thermogenesis	2/31	147/18903	0.0241023329794203	0.0819134807468666	0.045886544821128	ACADL/TLR4	2
BP	GO:0120161	regulation of cold-induced thermogenesis	2/31	147/18903	0.0241023329794203	0.0819134807468666	0.045886544821128	ACADL/TLR4	2
BP	GO:0018212	peptidyl-tyrosine modification	3/31	382/18903	0.0242229938685545	0.0819134807468666	0.045886544821128	IL6/MAP2K1/SRC	3
BP	GO:0006570	tyrosine metabolic process	1/31	15/18903	0.0243277826643148	0.0819134807468666	0.045886544821128	PAH	1
BP	GO:0009163	nucleoside biosynthetic process	1/31	15/18903	0.0243277826643148	0.0819134807468666	0.045886544821128	HPRT1	1
BP	GO:0033599	regulation of mammary gland epithelial cell proliferation	1/31	15/18903	0.0243277826643148	0.0819134807468666	0.045886544821128	GPX1	1
BP	GO:0034392	negative regulation of smooth muscle cell apoptotic process	1/31	15/18903	0.0243277826643148	0.0819134807468666	0.045886544821128	APOH	1
BP	GO:0034404	nucleobase-containing small molecule biosynthetic process	1/31	15/18903	0.0243277826643148	0.0819134807468666	0.045886544821128	HPRT1	1
BP	GO:0038166	angiotensin-activated signaling pathway	1/31	15/18903	0.0243277826643148	0.0819134807468666	0.045886544821128	SRC	1
BP	GO:0048308	organelle inheritance	1/31	15/18903	0.0243277826643148	0.0819134807468666	0.045886544821128	MAP2K1	1
BP	GO:0048313	Golgi inheritance	1/31	15/18903	0.0243277826643148	0.0819134807468666	0.045886544821128	MAP2K1	1
BP	GO:0051791	medium-chain fatty acid metabolic process	1/31	15/18903	0.0243277826643148	0.0819134807468666	0.045886544821128	ACADM	1
BP	GO:0060576	intestinal epithelial cell development	1/31	15/18903	0.0243277826643148	0.0819134807468666	0.045886544821128	SRC	1
BP	GO:0070571	negative regulation of neuron projection regeneration	1/31	15/18903	0.0243277826643148	0.0819134807468666	0.045886544821128	SPP1	1
BP	GO:0030900	forebrain development	3/31	383/18903	0.0243874895905748	0.0819134807468666	0.045886544821128	SRC/HPRT1/OGDH	3
BP	GO:0032147	activation of protein kinase activity	2/31	148/18903	0.0244078429587765	0.0819134807468666	0.045886544821128	MAP2K1/SRC	2
BP	GO:1902903	regulation of supramolecular fiber organization	3/31	384/18903	0.0245525988040636	0.0822392872563297	0.0460690561106396	HSPA1A/CDKN1B/GPX1	3
BP	GO:0032946	positive regulation of mononuclear cell proliferation	2/31	149/18903	0.0247149556276037	0.0824628596859117	0.0461942975997968	IL6/TLR4	2
BP	GO:2000377	regulation of reactive oxygen species metabolic process	2/31	149/18903	0.0247149556276037	0.0824628596859117	0.0461942975997968	TLR4/NFE2L2	2
BP	GO:0010821	regulation of mitochondrion organization	2/31	150/18903	0.025023665273634	0.0833317038552484	0.0466810093907661	HSPA1A/GPX1	2
BP	GO:0051961	negative regulation of nervous system development	2/31	151/18903	0.0253339661979571	0.0842024888082388	0.0471688083758738	IL6/SPP1	2
BP	GO:0002730	regulation of dendritic cell cytokine production	1/31	16/18903	0.025929108306914	0.0843311215405126	0.0472408662542734	TLR4	1
BP	GO:0006704	glucocorticoid biosynthetic process	1/31	16/18903	0.025929108306914	0.0843311215405126	0.0472408662542734	NR3C1	1
BP	GO:0006750	glutathione biosynthetic process	1/31	16/18903	0.025929108306914	0.0843311215405126	0.0472408662542734	NFE2L2	1
BP	GO:0006825	copper ion transport	1/31	16/18903	0.025929108306914	0.0843311215405126	0.0472408662542734	CP	1
BP	GO:0009074	aromatic amino acid family catabolic process	1/31	16/18903	0.025929108306914	0.0843311215405126	0.0472408662542734	PAH	1
BP	GO:0010715	regulation of extracellular matrix disassembly	1/31	16/18903	0.025929108306914	0.0843311215405126	0.0472408662542734	IL6	1
BP	GO:0031053	primary miRNA processing	1/31	16/18903	0.025929108306914	0.0843311215405126	0.0472408662542734	IL6	1
BP	GO:0034112	positive regulation of homotypic cell-cell adhesion	1/31	16/18903	0.025929108306914	0.0843311215405126	0.0472408662542734	IL6	1
BP	GO:0045779	negative regulation of bone resorption	1/31	16/18903	0.025929108306914	0.0843311215405126	0.0472408662542734	IL6	1
BP	GO:0090030	regulation of steroid hormone biosynthetic process	1/31	16/18903	0.025929108306914	0.0843311215405126	0.0472408662542734	NR3C1	1
BP	GO:1903799	negative regulation of miRNA maturation	1/31	16/18903	0.025929108306914	0.0843311215405126	0.0472408662542734	IL6	1
BP	GO:0030902	hindbrain development	2/31	153/18903	0.0259593191524708	0.0843311215405126	0.0472408662542734	MAP2K1/OGDH	2
BP	GO:0050729	positive regulation of inflammatory response	2/31	154/18903	0.0262743598513932	0.0850342790687679	0.0476347631945867	IL6/TLR4	2
BP	GO:0051092	positive regulation of NF-kappaB transcription factor activity	2/31	154/18903	0.0262743598513932	0.0850342790687679	0.0476347631945867	HSPA1A/TLR4	2
BP	GO:0050871	positive regulation of B cell activation	2/31	155/18903	0.0265909691660196	0.0857372370306241	0.0480285483411826	IL6/TLR4	2
BP	GO:0070507	regulation of microtubule cytoskeleton organization	2/31	155/18903	0.0265909691660196	0.0857372370306241	0.0480285483411826	HSPA1A/CDKN1B	2
BP	GO:0050770	regulation of axonogenesis	2/31	156/18903	0.0269091414638357	0.0862504775681577	0.0483160569992792	MAP2K1/SPP1	2
BP	GO:0051251	positive regulation of lymphocyte activation	3/31	400/18903	0.0272777732032109	0.0862504775681577	0.0483160569992792	IL6/SRC/TLR4	3
BP	GO:0002371	dendritic cell cytokine production	1/31	17/18903	0.0275278904132561	0.0862504775681577	0.0483160569992792	TLR4	1
BP	GO:0006103	2-oxoglutarate metabolic process	1/31	17/18903	0.0275278904132561	0.0862504775681577	0.0483160569992792	OGDH	1
BP	GO:0007096	regulation of exit from mitosis	1/31	17/18903	0.0275278904132561	0.0862504775681577	0.0483160569992792	CDKN1B	1
BP	GO:0009404	toxin metabolic process	1/31	17/18903	0.0275278904132561	0.0862504775681577	0.0483160569992792	NFE2L2	1
BP	GO:0033194	response to hydroperoxide	1/31	17/18903	0.0275278904132561	0.0862504775681577	0.0483160569992792	GPX1	1
BP	GO:0033623	regulation of integrin activation	1/31	17/18903	0.0275278904132561	0.0862504775681577	0.0483160569992792	SRC	1
BP	GO:0051895	negative regulation of focal adhesion assembly	1/31	17/18903	0.0275278904132561	0.0862504775681577	0.0483160569992792	SRC	1
BP	GO:0072378	blood coagulation, fibrin clot formation	1/31	17/18903	0.0275278904132561	0.0862504775681577	0.0483160569992792	APOH	1
BP	GO:0090083	regulation of inclusion body assembly	1/31	17/18903	0.0275278904132561	0.0862504775681577	0.0483160569992792	HSPA1A	1
BP	GO:0090594	inflammatory response to wounding	1/31	17/18903	0.0275278904132561	0.0862504775681577	0.0483160569992792	TLR4	1
BP	GO:0150118	negative regulation of cell-substrate junction organization	1/31	17/18903	0.0275278904132561	0.0862504775681577	0.0483160569992792	SRC	1
BP	GO:1902036	regulation of hematopoietic stem cell differentiation	1/31	17/18903	0.0275278904132561	0.0862504775681577	0.0483160569992792	NFE2L2	1
BP	GO:1903358	regulation of Golgi organization	1/31	17/18903	0.0275278904132561	0.0862504775681577	0.0483160569992792	MAP2K1	1
BP	GO:0044409	entry into host	2/31	158/18903	0.0275501525449593	0.0862504775681577	0.0483160569992792	HSPA1A/SRC	2
BP	GO:0007605	sensory perception of sound	2/31	159/18903	0.0278729801291405	0.0866349057295177	0.0485314071455056	CDKN1B/GPX1	2
BP	GO:1990845	adaptive thermogenesis	2/31	160/18903	0.0281973482982065	0.0866349057295177	0.0485314071455056	ACADL/TLR4	2
BP	GO:0030099	myeloid cell differentiation	3/31	407/18903	0.0285193925386407	0.0866349057295177	0.0485314071455056	HSPA1A/SRC/TLR4	3
BP	GO:0002295	T-helper cell lineage commitment	1/31	18/18903	0.0291241328890153	0.0866349057295177	0.0485314071455056	IL6	1
BP	GO:0002830	positive regulation of type 2 immune response	1/31	18/18903	0.0291241328890153	0.0866349057295177	0.0485314071455056	IL6	1
BP	GO:0006309	apoptotic DNA fragmentation	1/31	18/18903	0.0291241328890153	0.0866349057295177	0.0485314071455056	IL6	1
BP	GO:0006977	DNA damage response, signal transduction by p53 class mediator resulting in cell cycle arrest	1/31	18/18903	0.0291241328890153	0.0866349057295177	0.0485314071455056	CDKN1B	1
BP	GO:0009125	nucleoside monophosphate catabolic process	1/31	18/18903	0.0291241328890153	0.0866349057295177	0.0485314071455056	HPRT1	1
BP	GO:0019184	nonribosomal peptide biosynthetic process	1/31	18/18903	0.0291241328890153	0.0866349057295177	0.0485314071455056	NFE2L2	1
BP	GO:0033033	negative regulation of myeloid cell apoptotic process	1/31	18/18903	0.0291241328890153	0.0866349057295177	0.0485314071455056	APOH	1
BP	GO:0036035	osteoclast development	1/31	18/18903	0.0291241328890153	0.0866349057295177	0.0485314071455056	SRC	1
BP	GO:0036499	PERK-mediated unfolded protein response	1/31	18/18903	0.0291241328890153	0.0866349057295177	0.0485314071455056	NFE2L2	1
BP	GO:0038128	ERBB2 signaling pathway	1/31	18/18903	0.0291241328890153	0.0866349057295177	0.0485314071455056	SRC	1
BP	GO:0042407	cristae formation	1/31	18/18903	0.0291241328890153	0.0866349057295177	0.0485314071455056	IMMT	1
BP	GO:0043173	nucleotide salvage	1/31	18/18903	0.0291241328890153	0.0866349057295177	0.0485314071455056	HPRT1	1
BP	GO:0046040	IMP metabolic process	1/31	18/18903	0.0291241328890153	0.0866349057295177	0.0485314071455056	HPRT1	1
BP	GO:0046112	nucleobase biosynthetic process	1/31	18/18903	0.0291241328890153	0.0866349057295177	0.0485314071455056	HPRT1	1
BP	GO:0046851	negative regulation of bone remodeling	1/31	18/18903	0.0291241328890153	0.0866349057295177	0.0485314071455056	IL6	1
BP	GO:0051770	positive regulation of nitric-oxide synthase biosynthetic process	1/31	18/18903	0.0291241328890153	0.0866349057295177	0.0485314071455056	TLR4	1
BP	GO:0051900	regulation of mitochondrial depolarization	1/31	18/18903	0.0291241328890153	0.0866349057295177	0.0485314071455056	SRC	1
BP	GO:0051917	regulation of fibrinolysis	1/31	18/18903	0.0291241328890153	0.0866349057295177	0.0485314071455056	APOH	1
BP	GO:0072567	chemokine (C-X-C motif) ligand 2 production	1/31	18/18903	0.0291241328890153	0.0866349057295177	0.0485314071455056	TLR4	1
BP	GO:0072673	lamellipodium morphogenesis	1/31	18/18903	0.0291241328890153	0.0866349057295177	0.0485314071455056	SRC	1
BP	GO:0086103	G protein-coupled receptor signaling pathway involved in heart process	1/31	18/18903	0.0291241328890153	0.0866349057295177	0.0485314071455056	SRC	1
BP	GO:0098962	regulation of postsynaptic neurotransmitter receptor activity	1/31	18/18903	0.0291241328890153	0.0866349057295177	0.0485314071455056	SRC	1
BP	GO:0150078	positive regulation of neuroinflammatory response	1/31	18/18903	0.0291241328890153	0.0866349057295177	0.0485314071455056	IL6	1
BP	GO:2000341	regulation of chemokine (C-X-C motif) ligand 2 production	1/31	18/18903	0.0291241328890153	0.0866349057295177	0.0485314071455056	TLR4	1
BP	GO:2000811	negative regulation of anoikis	1/31	18/18903	0.0291241328890153	0.0866349057295177	0.0485314071455056	SRC	1
BP	GO:0035966	response to topologically incorrect protein	2/31	163/18903	0.0291796407123767	0.0866349057295177	0.0485314071455056	HSPA1A/NFE2L2	2
BP	GO:0140053	mitochondrial gene expression	2/31	163/18903	0.0291796407123767	0.0866349057295177	0.0485314071455056	TFAM/POLRMT	2
BP	GO:0050678	regulation of epithelial cell proliferation	3/31	414/18903	0.0297910165889771	0.0882981161786691	0.0494631094749158	APOH/CDKN1B/GPX1	3
BP	GO:0001959	regulation of cytokine-mediated signaling pathway	2/31	167/18903	0.0305105958938473	0.0895072185283414	0.0501404281367002	HSPA1A/IL6	2
BP	GO:0070665	positive regulation of leukocyte proliferation	2/31	167/18903	0.0305105958938473	0.0895072185283414	0.0501404281367002	IL6/TLR4	2
BP	GO:0006743	ubiquinone metabolic process	1/31	19/18903	0.0307178396340743	0.0895072185283414	0.0501404281367002	NQO1	1
BP	GO:0007625	grooming behavior	1/31	19/18903	0.0307178396340743	0.0895072185283414	0.0501404281367002	HPRT1	1
BP	GO:0035743	CD4-positive, alpha-beta T cell cytokine production	1/31	19/18903	0.0307178396340743	0.0895072185283414	0.0501404281367002	IL6	1
BP	GO:0036003	positive regulation of transcription from RNA polymerase II promoter in response to stress	1/31	19/18903	0.0307178396340743	0.0895072185283414	0.0501404281367002	NFE2L2	1
BP	GO:0045346	regulation of MHC class II biosynthetic process	1/31	19/18903	0.0307178396340743	0.0895072185283414	0.0501404281367002	TLR4	1
BP	GO:0060438	trachea development	1/31	19/18903	0.0307178396340743	0.0895072185283414	0.0501404281367002	MAP2K1	1
BP	GO:0071800	podosome assembly	1/31	19/18903	0.0307178396340743	0.0895072185283414	0.0501404281367002	SRC	1
BP	GO:1901659	glycosyl compound biosynthetic process	1/31	19/18903	0.0307178396340743	0.0895072185283414	0.0501404281367002	HPRT1	1
BP	GO:0043434	response to peptide hormone	3/31	421/18903	0.0310926042425198	0.09044644573077	0.0506665673109668	SRC/CDKN1B/NFE2L2	3
BP	GO:0002262	myeloid cell homeostasis	2/31	169/18903	0.0311850739249649	0.0904757306588808	0.0506829722317941	HSPA1A/IL6	2
BP	GO:0001558	regulation of cell growth	3/31	422/18903	0.0312809884543507	0.0904757306588808	0.0506829722317941	HSPA1A/SPP1/CDKN1B	3
BP	GO:0034250	positive regulation of cellular amide metabolic process	2/31	170/18903	0.0315245439191172	0.0904757306588808	0.0506829722317941	IL6/NFE2L2	2
BP	GO:2000058	regulation of ubiquitin-dependent protein catabolic process	2/31	170/18903	0.0315245439191172	0.0904757306588808	0.0506829722317941	HSPA1A/NFE2L2	2
BP	GO:0016482	cytosolic transport	2/31	171/18903	0.0318654939784552	0.0904757306588808	0.0506829722317941	MAP2K1/SRC	2
BP	GO:0001780	neutrophil homeostasis	1/31	20/18903	0.0323090145425337	0.0904757306588808	0.0506829722317941	IL6	1
BP	GO:0006144	purine nucleobase metabolic process	1/31	20/18903	0.0323090145425337	0.0904757306588808	0.0506829722317941	HPRT1	1
BP	GO:0009168	purine ribonucleoside monophosphate biosynthetic process	1/31	20/18903	0.0323090145425337	0.0904757306588808	0.0506829722317941	HPRT1	1
BP	GO:0014856	skeletal muscle cell proliferation	1/31	20/18903	0.0323090145425337	0.0904757306588808	0.0506829722317941	SRC	1
BP	GO:0032211	negative regulation of telomere maintenance via telomerase	1/31	20/18903	0.0323090145425337	0.0904757306588808	0.0506829722317941	SRC	1
BP	GO:0035795	negative regulation of mitochondrial membrane permeability	1/31	20/18903	0.0323090145425337	0.0904757306588808	0.0506829722317941	HSPA1A	1
BP	GO:0042053	regulation of dopamine metabolic process	1/31	20/18903	0.0323090145425337	0.0904757306588808	0.0506829722317941	HPRT1	1
BP	GO:0042069	regulation of catecholamine metabolic process	1/31	20/18903	0.0323090145425337	0.0904757306588808	0.0506829722317941	HPRT1	1
BP	GO:0045342	MHC class II biosynthetic process	1/31	20/18903	0.0323090145425337	0.0904757306588808	0.0506829722317941	TLR4	1
BP	GO:0048670	regulation of collateral sprouting	1/31	20/18903	0.0323090145425337	0.0904757306588808	0.0506829722317941	SPP1	1
BP	GO:0051004	regulation of lipoprotein lipase activity	1/31	20/18903	0.0323090145425337	0.0904757306588808	0.0506829722317941	APOH	1
BP	GO:0051882	mitochondrial depolarization	1/31	20/18903	0.0323090145425337	0.0904757306588808	0.0506829722317941	SRC	1
BP	GO:0072376	protein activation cascade	1/31	20/18903	0.0323090145425337	0.0904757306588808	0.0506829722317941	APOH	1
BP	GO:0098543	detection of other organism	1/31	20/18903	0.0323090145425337	0.0904757306588808	0.0506829722317941	TLR4	1
BP	GO:1900225	regulation of NLRP3 inflammasome complex assembly	1/31	20/18903	0.0323090145425337	0.0904757306588808	0.0506829722317941	TLR4	1
BP	GO:1902236	negative regulation of endoplasmic reticulum stress-induced intrinsic apoptotic signaling pathway	1/31	20/18903	0.0323090145425337	0.0904757306588808	0.0506829722317941	HSPA1A	1
BP	GO:1903978	regulation of microglial cell activation	1/31	20/18903	0.0323090145425337	0.0904757306588808	0.0506829722317941	IL6	1
BP	GO:1904292	regulation of ERAD pathway	1/31	20/18903	0.0323090145425337	0.0904757306588808	0.0506829722317941	NFE2L2	1
BP	GO:0034655	nucleobase-containing compound catabolic process	3/31	428/18903	0.0324241036842555	0.0906508571399363	0.0507810751209529	HSPA1A/IL6/HPRT1	3
BP	GO:0031331	positive regulation of cellular catabolic process	3/31	429/18903	0.032616756168807	0.0910419164906021	0.0510001399471382	HSPA1A/IL6/NFE2L2	3
BP	GO:0021953	central nervous system neuron differentiation	2/31	174/18903	0.0328971703677186	0.091676282527164	0.0513555010586951	HPRT1/OGDH	2
BP	GO:0010634	positive regulation of epithelial cell migration	2/31	176/18903	0.033592255846825	0.0924958975283411	0.0518146355032904	SRC/NFE2L2	2
BP	GO:0032635	interleukin-6 production	2/31	176/18903	0.033592255846825	0.0924958975283411	0.0518146355032904	IL6/TLR4	2
BP	GO:0032675	regulation of interleukin-6 production	2/31	176/18903	0.033592255846825	0.0924958975283411	0.0518146355032904	IL6/TLR4	2
BP	GO:0050680	negative regulation of epithelial cell proliferation	2/31	176/18903	0.033592255846825	0.0924958975283411	0.0518146355032904	APOH/CDKN1B	2
BP	GO:0007252	I-kappaB phosphorylation	1/31	21/18903	0.0338976615027188	0.0924958975283411	0.0518146355032904	TLR4	1
BP	GO:0009083	branched-chain amino acid catabolic process	1/31	21/18903	0.0338976615027188	0.0924958975283411	0.0518146355032904	BCKDHB	1
BP	GO:0038083	peptidyl-tyrosine autophosphorylation	1/31	21/18903	0.0338976615027188	0.0924958975283411	0.0518146355032904	SRC	1
BP	GO:0043373	CD4-positive, alpha-beta T cell lineage commitment	1/31	21/18903	0.0338976615027188	0.0924958975283411	0.0518146355032904	IL6	1
BP	GO:0045056	transcytosis	1/31	21/18903	0.0338976615027188	0.0924958975283411	0.0518146355032904	SRC	1
BP	GO:0060252	positive regulation of glial cell proliferation	1/31	21/18903	0.0338976615027188	0.0924958975283411	0.0518146355032904	IL6	1
BP	GO:0090201	negative regulation of release of cytochrome c from mitochondria	1/31	21/18903	0.0338976615027188	0.0924958975283411	0.0518146355032904	GPX1	1
BP	GO:1901522	positive regulation of transcription from RNA polymerase II promoter involved in cellular response to chemical stimulus	1/31	21/18903	0.0338976615027188	0.0924958975283411	0.0518146355032904	NFE2L2	1
BP	GO:1903206	negative regulation of hydrogen peroxide-induced cell death	1/31	21/18903	0.0338976615027188	0.0924958975283411	0.0518146355032904	NFE2L2	1
BP	GO:0043534	blood vessel endothelial cell migration	2/31	177/18903	0.0339419728321391	0.0924958975283411	0.0518146355032904	GPX1/NFE2L2	2
BP	GO:0050954	sensory perception of mechanical stimulus	2/31	180/18903	0.0349997566329169	0.0931651873442224	0.0521895603246353	CDKN1B/GPX1	2
BP	GO:0002223	stimulatory C-type lectin receptor signaling pathway	1/31	22/18903	0.0354837843971908	0.0931651873442224	0.0521895603246353	SRC	1
BP	GO:0009127	purine nucleoside monophosphate biosynthetic process	1/31	22/18903	0.0354837843971908	0.0931651873442224	0.0521895603246353	HPRT1	1
BP	GO:0009713	catechol-containing compound biosynthetic process	1/31	22/18903	0.0354837843971908	0.0931651873442224	0.0521895603246353	PAH	1
BP	GO:0010888	negative regulation of lipid storage	1/31	22/18903	0.0354837843971908	0.0931651873442224	0.0521895603246353	IL6	1
BP	GO:0030277	maintenance of gastrointestinal epithelium	1/31	22/18903	0.0354837843971908	0.0931651873442224	0.0521895603246353	TLR4	1
BP	GO:0032069	regulation of nuclease activity	1/31	22/18903	0.0354837843971908	0.0931651873442224	0.0521895603246353	HSPA1A	1
BP	GO:0032700	negative regulation of interleukin-17 production	1/31	22/18903	0.0354837843971908	0.0931651873442224	0.0521895603246353	TLR4	1
BP	GO:0034104	negative regulation of tissue remodeling	1/31	22/18903	0.0354837843971908	0.0931651873442224	0.0521895603246353	IL6	1
BP	GO:0042423	catecholamine biosynthetic process	1/31	22/18903	0.0354837843971908	0.0931651873442224	0.0521895603246353	PAH	1
BP	GO:0044546	NLRP3 inflammasome complex assembly	1/31	22/18903	0.0354837843971908	0.0931651873442224	0.0521895603246353	TLR4	1
BP	GO:0045717	negative regulation of fatty acid biosynthetic process	1/31	22/18903	0.0354837843971908	0.0931651873442224	0.0521895603246353	ACADL	1
BP	GO:0046128	purine ribonucleoside metabolic process	1/31	22/18903	0.0354837843971908	0.0931651873442224	0.0521895603246353	HPRT1	1
BP	GO:0046628	positive regulation of insulin receptor signaling pathway	1/31	22/18903	0.0354837843971908	0.0931651873442224	0.0521895603246353	SRC	1
BP	GO:0051767	nitric-oxide synthase biosynthetic process	1/31	22/18903	0.0354837843971908	0.0931651873442224	0.0521895603246353	TLR4	1
BP	GO:0051769	regulation of nitric-oxide synthase biosynthetic process	1/31	22/18903	0.0354837843971908	0.0931651873442224	0.0521895603246353	TLR4	1
BP	GO:0060065	uterus development	1/31	22/18903	0.0354837843971908	0.0931651873442224	0.0521895603246353	SRC	1
BP	GO:0072574	hepatocyte proliferation	1/31	22/18903	0.0354837843971908	0.0931651873442224	0.0521895603246353	IL6	1
BP	GO:0072575	epithelial cell proliferation involved in liver morphogenesis	1/31	22/18903	0.0354837843971908	0.0931651873442224	0.0521895603246353	IL6	1
BP	GO:1903209	positive regulation of oxidative stress-induced cell death	1/31	22/18903	0.0354837843971908	0.0931651873442224	0.0521895603246353	TLR4	1
BP	GO:1903428	positive regulation of reactive oxygen species biosynthetic process	1/31	22/18903	0.0354837843971908	0.0931651873442224	0.0521895603246353	TLR4	1
BP	GO:1990840	response to lectin	1/31	22/18903	0.0354837843971908	0.0931651873442224	0.0521895603246353	SRC	1
BP	GO:1990858	cellular response to lectin	1/31	22/18903	0.0354837843971908	0.0931651873442224	0.0521895603246353	SRC	1
BP	GO:2000831	regulation of steroid hormone secretion	1/31	22/18903	0.0354837843971908	0.0931651873442224	0.0521895603246353	SPP1	1
BP	GO:0046890	regulation of lipid biosynthetic process	2/31	182/18903	0.0357120866747239	0.0936221117232502	0.0524455216243745	ACADL/NR3C1	2
BP	GO:0010975	regulation of neuron projection development	3/31	446/18903	0.0359848464590701	0.0941322271486445	0.0527312796475702	MAP2K1/SPP1/NFE2L2	3
BP	GO:0007219	Notch signaling pathway	2/31	183/18903	0.0360703780552197	0.0941322271486445	0.0527312796475702	SRC/CDKN1B	2
BP	GO:0044000	movement in host	2/31	183/18903	0.0360703780552197	0.0941322271486445	0.0527312796475702	HSPA1A/SRC	2
BP	GO:0032640	tumor necrosis factor production	2/31	184/18903	0.0364300799745665	0.0941697242301107	0.0527522848776455	IL6/TLR4	2
BP	GO:0032680	regulation of tumor necrosis factor production	2/31	184/18903	0.0364300799745665	0.0941697242301107	0.0527522848776455	IL6/TLR4	2
BP	GO:0050728	negative regulation of inflammatory response	2/31	184/18903	0.0364300799745665	0.0941697242301107	0.0527522848776455	SRC/GPX1	2
BP	GO:0002683	negative regulation of immune system process	3/31	449/18903	0.0365974004037864	0.0941697242301107	0.0527522848776455	SRC/TLR4/GPX1	3
BP	GO:1905952	regulation of lipid localization	2/31	185/18903	0.0367911871727281	0.0941697242301107	0.0527522848776455	IL6/SPP1	2
BP	GO:0002696	positive regulation of leukocyte activation	3/31	450/18903	0.0368027937598826	0.0941697242301107	0.0527522848776455	IL6/SRC/TLR4	3
BP	GO:0002363	alpha-beta T cell lineage commitment	1/31	23/18903	0.0370673871027508	0.0941697242301107	0.0527522848776455	IL6	1
BP	GO:0010155	regulation of proton transport	1/31	23/18903	0.0370673871027508	0.0941697242301107	0.0527522848776455	NDUFA4	1
BP	GO:0032727	positive regulation of interferon-alpha production	1/31	23/18903	0.0370673871027508	0.0941697242301107	0.0527522848776455	TLR4	1
BP	GO:0048143	astrocyte activation	1/31	23/18903	0.0370673871027508	0.0941697242301107	0.0527522848776455	IL6	1
BP	GO:0051131	chaperone-mediated protein complex assembly	1/31	23/18903	0.0370673871027508	0.0941697242301107	0.0527522848776455	HSPA1A	1
BP	GO:0060444	branching involved in mammary gland duct morphogenesis	1/31	23/18903	0.0370673871027508	0.0941697242301107	0.0527522848776455	SRC	1
BP	GO:0060965	negative regulation of miRNA-mediated gene silencing	1/31	23/18903	0.0370673871027508	0.0941697242301107	0.0527522848776455	IL6	1
BP	GO:0072576	liver morphogenesis	1/31	23/18903	0.0370673871027508	0.0941697242301107	0.0527522848776455	IL6	1
BP	GO:0097164	ammonium ion metabolic process	1/31	23/18903	0.0370673871027508	0.0941697242301107	0.0527522848776455	BCHE	1
BP	GO:1901032	negative regulation of response to reactive oxygen species	1/31	23/18903	0.0370673871027508	0.0941697242301107	0.0527522848776455	NFE2L2	1
BP	GO:1901673	regulation of mitotic spindle assembly	1/31	23/18903	0.0370673871027508	0.0941697242301107	0.0527522848776455	HSPA1A	1
BP	GO:1905709	negative regulation of membrane permeability	1/31	23/18903	0.0370673871027508	0.0941697242301107	0.0527522848776455	HSPA1A	1
BP	GO:0043405	regulation of MAP kinase activity	2/31	186/18903	0.0371536944021364	0.0942501806524784	0.052797355203036	SRC/TLR4	2
BP	GO:0002221	pattern recognition receptor signaling pathway	2/31	187/18903	0.0375175964276666	0.094834447753957	0.0531246517395164	HSPA1A/TLR4	2
BP	GO:0002700	regulation of production of molecular mediator of immune response	2/31	187/18903	0.0375175964276666	0.094834447753957	0.0531246517395164	IL6/TLR4	2
BP	GO:0051090	regulation of DNA-binding transcription factor activity	3/31	454/18903	0.0376304031585023	0.094834447753957	0.0531246517395164	HSPA1A/IL6/TLR4	3
BP	GO:0002833	positive regulation of response to biotic stimulus	2/31	188/18903	0.0378828880266125	0.094834447753957	0.0531246517395164	SRC/TLR4	2
BP	GO:0010721	negative regulation of cell development	2/31	188/18903	0.0378828880266125	0.094834447753957	0.0531246517395164	IL6/SPP1	2
BP	GO:0051960	regulation of nervous system development	3/31	456/18903	0.0380478253372584	0.094834447753957	0.0531246517395164	IL6/MAP2K1/SPP1	3
BP	GO:0051896	regulation of protein kinase B signaling	2/31	189/18903	0.0382495639886625	0.094834447753957	0.0531246517395164	SRC/GPX1	2
BP	GO:0071706	tumor necrosis factor superfamily cytokine production	2/31	189/18903	0.0382495639886625	0.094834447753957	0.0531246517395164	IL6/TLR4	2
BP	GO:1903555	regulation of tumor necrosis factor superfamily cytokine production	2/31	189/18903	0.0382495639886625	0.094834447753957	0.0531246517395164	IL6/TLR4	2
BP	GO:0050777	negative regulation of immune response	2/31	190/18903	0.0386176191158743	0.094834447753957	0.0531246517395164	SRC/GPX1	2
BP	GO:0002755	MyD88-dependent toll-like receptor signaling pathway	1/31	24/18903	0.0386484734904532	0.094834447753957	0.0531246517395164	TLR4	1
BP	GO:0006123	mitochondrial electron transport, cytochrome c to oxygen	1/31	24/18903	0.0386484734904532	0.094834447753957	0.0531246517395164	NDUFA4	1
BP	GO:0006925	inflammatory cell apoptotic process	1/31	24/18903	0.0386484734904532	0.094834447753957	0.0531246517395164	IL6	1
BP	GO:0010640	regulation of platelet-derived growth factor receptor signaling pathway	1/31	24/18903	0.0386484734904532	0.094834447753957	0.0531246517395164	SRC	1
BP	GO:0021884	forebrain neuron development	1/31	24/18903	0.0386484734904532	0.094834447753957	0.0531246517395164	OGDH	1
BP	GO:0043369	CD4-positive or CD8-positive, alpha-beta T cell lineage commitment	1/31	24/18903	0.0386484734904532	0.094834447753957	0.0531246517395164	IL6	1
BP	GO:0048011	neurotrophin TRK receptor signaling pathway	1/31	24/18903	0.0386484734904532	0.094834447753957	0.0531246517395164	SRC	1
BP	GO:0060149	negative regulation of post-transcriptional gene silencing	1/31	24/18903	0.0386484734904532	0.094834447753957	0.0531246517395164	IL6	1
BP	GO:0060907	positive regulation of macrophage cytokine production	1/31	24/18903	0.0386484734904532	0.094834447753957	0.0531246517395164	TLR4	1
BP	GO:0060967	negative regulation of gene silencing by RNA	1/31	24/18903	0.0386484734904532	0.094834447753957	0.0531246517395164	IL6	1
BP	GO:0070841	inclusion body assembly	1/31	24/18903	0.0386484734904532	0.094834447753957	0.0531246517395164	HSPA1A	1
BP	GO:0140632	inflammasome complex assembly	1/31	24/18903	0.0386484734904532	0.094834447753957	0.0531246517395164	TLR4	1
BP	GO:1900369	negative regulation of post-transcriptional gene silencing by RNA	1/31	24/18903	0.0386484734904532	0.094834447753957	0.0531246517395164	IL6	1
BP	GO:0009755	hormone-mediated signaling pathway	2/31	192/18903	0.0393578461357173	0.096110327990546	0.0538393782427589	NR3C1/SRC	2
BP	GO:0002443	leukocyte mediated immunity	3/31	463/18903	0.0395277529105883	0.096110327990546	0.0538393782427589	IL6/TLR4/HPRT1	3
BP	GO:0048839	inner ear development	2/31	193/18903	0.0397300076940929	0.096110327990546	0.0538393782427589	PVALB/CDKN1B	2
BP	GO:0050731	positive regulation of peptidyl-tyrosine phosphorylation	2/31	193/18903	0.0397300076940929	0.096110327990546	0.0538393782427589	IL6/SRC	2
BP	GO:0009749	response to glucose	2/31	194/18903	0.0401035277490711	0.096110327990546	0.0538393782427589	CDKN1B/GPX1	2
BP	GO:0008211	glucocorticoid metabolic process	1/31	25/18903	0.0402270474256082	0.096110327990546	0.0538393782427589	NR3C1	1
BP	GO:0021697	cerebellar cortex formation	1/31	25/18903	0.0402270474256082	0.096110327990546	0.0538393782427589	MAP2K1	1
BP	GO:0035330	regulation of hippo signaling	1/31	25/18903	0.0402270474256082	0.096110327990546	0.0538393782427589	SRC	1
BP	GO:0046033	AMP metabolic process	1/31	25/18903	0.0402270474256082	0.096110327990546	0.0538393782427589	HPRT1	1
BP	GO:0046697	decidualization	1/31	25/18903	0.0402270474256082	0.096110327990546	0.0538393782427589	SPP1	1
BP	GO:0046885	regulation of hormone biosynthetic process	1/31	25/18903	0.0402270474256082	0.096110327990546	0.0538393782427589	NR3C1	1
BP	GO:0048668	collateral sprouting	1/31	25/18903	0.0402270474256082	0.096110327990546	0.0538393782427589	SPP1	1
BP	GO:0051560	mitochondrial calcium ion homeostasis	1/31	25/18903	0.0402270474256082	0.096110327990546	0.0538393782427589	IMMT	1
BP	GO:0060575	intestinal epithelial cell differentiation	1/31	25/18903	0.0402270474256082	0.096110327990546	0.0538393782427589	SRC	1
BP	GO:0098581	detection of external biotic stimulus	1/31	25/18903	0.0402270474256082	0.096110327990546	0.0538393782427589	TLR4	1
BP	GO:1900078	positive regulation of cellular response to insulin stimulus	1/31	25/18903	0.0402270474256082	0.096110327990546	0.0538393782427589	SRC	1
BP	GO:1901028	regulation of mitochondrial outer membrane permeabilization involved in apoptotic signaling pathway	1/31	25/18903	0.0402270474256082	0.096110327990546	0.0538393782427589	HSPA1A	1
BP	GO:1904996	positive regulation of leukocyte adhesion to vascular endothelial cell	1/31	25/18903	0.0402270474256082	0.096110327990546	0.0538393782427589	IL6	1
BP	GO:2000209	regulation of anoikis	1/31	25/18903	0.0402270474256082	0.096110327990546	0.0538393782427589	SRC	1
BP	GO:0050867	positive regulation of cell activation	3/31	467/18903	0.0403866299882522	0.0963106786320442	0.0539516112794609	IL6/SRC/TLR4	3
BP	GO:0032872	regulation of stress-activated MAPK cascade	2/31	195/18903	0.0404784011641925	0.0963106786320442	0.0539516112794609	MAP2K1/TLR4	2
BP	GO:0051495	positive regulation of cytoskeleton organization	2/31	195/18903	0.0404784011641925	0.0963106786320442	0.0539516112794609	HSPA1A/CDKN1B	2
BP	GO:0070302	regulation of stress-activated protein kinase signaling cascade	2/31	198/18903	0.0416110903890328	0.0979760455495211	0.0548845216259103	MAP2K1/TLR4	2
BP	GO:0000737	DNA catabolic process, endonucleolytic	1/31	26/18903	0.0418031127677957	0.0979760455495211	0.0548845216259103	IL6	1
BP	GO:0002433	immune response-regulating cell surface receptor signaling pathway involved in phagocytosis	1/31	26/18903	0.0418031127677957	0.0979760455495211	0.0548845216259103	SRC	1
BP	GO:0002726	positive regulation of T cell cytokine production	1/31	26/18903	0.0418031127677957	0.0979760455495211	0.0548845216259103	IL6	1
BP	GO:0006706	steroid catabolic process	1/31	26/18903	0.0418031127677957	0.0979760455495211	0.0548845216259103	SPP1	1
BP	GO:0010954	positive regulation of protein processing	1/31	26/18903	0.0418031127677957	0.0979760455495211	0.0548845216259103	SRC	1
BP	GO:0033598	mammary gland epithelial cell proliferation	1/31	26/18903	0.0418031127677957	0.0979760455495211	0.0548845216259103	GPX1	1
BP	GO:0033622	integrin activation	1/31	26/18903	0.0418031127677957	0.0979760455495211	0.0548845216259103	SRC	1
BP	GO:0038096	Fc-gamma receptor signaling pathway involved in phagocytosis	1/31	26/18903	0.0418031127677957	0.0979760455495211	0.0548845216259103	SRC	1
BP	GO:0042178	xenobiotic catabolic process	1/31	26/18903	0.0418031127677957	0.0979760455495211	0.0548845216259103	FMO4	1
BP	GO:1904753	negative regulation of vascular associated smooth muscle cell migration	1/31	26/18903	0.0418031127677957	0.0979760455495211	0.0548845216259103	NFE2L2	1
BP	GO:0009746	response to hexose	2/31	199/18903	0.041991326124245	0.0982836330587825	0.0550568269400228	CDKN1B/GPX1	2
BP	GO:0032271	regulation of protein polymerization	2/31	201/18903	0.0427557761133472	0.0989745523343216	0.0554438682184026	HSPA1A/CDKN1B	2
BP	GO:0009081	branched-chain amino acid metabolic process	1/31	27/18903	0.0433766733708679	0.0989745523343216	0.0554438682184026	BCKDHB	1
BP	GO:0021895	cerebral cortex neuron differentiation	1/31	27/18903	0.0433766733708679	0.0989745523343216	0.0554438682184026	HPRT1	1
BP	GO:0030262	apoptotic nuclear changes	1/31	27/18903	0.0433766733708679	0.0989745523343216	0.0554438682184026	IL6	1
BP	GO:0030325	adrenal gland development	1/31	27/18903	0.0433766733708679	0.0989745523343216	0.0554438682184026	NR3C1	1
BP	GO:0031639	plasminogen activation	1/31	27/18903	0.0433766733708679	0.0989745523343216	0.0554438682184026	APOH	1
BP	GO:0031954	positive regulation of protein autophosphorylation	1/31	27/18903	0.0433766733708679	0.0989745523343216	0.0554438682184026	SRC	1
BP	GO:0032682	negative regulation of chemokine production	1/31	27/18903	0.0433766733708679	0.0989745523343216	0.0554438682184026	IL6	1
BP	GO:0032740	positive regulation of interleukin-17 production	1/31	27/18903	0.0433766733708679	0.0989745523343216	0.0554438682184026	IL6	1
BP	GO:0035929	steroid hormone secretion	1/31	27/18903	0.0433766733708679	0.0989745523343216	0.0554438682184026	SPP1	1
BP	GO:0042026	protein refolding	1/31	27/18903	0.0433766733708679	0.0989745523343216	0.0554438682184026	HSPA1A	1
BP	GO:0042278	purine nucleoside metabolic process	1/31	27/18903	0.0433766733708679	0.0989745523343216	0.0554438682184026	HPRT1	1
BP	GO:0042730	fibrinolysis	1/31	27/18903	0.0433766733708679	0.0989745523343216	0.0554438682184026	APOH	1
BP	GO:0046037	GMP metabolic process	1/31	27/18903	0.0433766733708679	0.0989745523343216	0.0554438682184026	HPRT1	1
BP	GO:0071280	cellular response to copper ion	1/31	27/18903	0.0433766733708679	0.0989745523343216	0.0554438682184026	NFE2L2	1
BP	GO:0071549	cellular response to dexamethasone stimulus	1/31	27/18903	0.0433766733708679	0.0989745523343216	0.0554438682184026	NR3C1	1
BP	GO:1903055	positive regulation of extracellular matrix organization	1/31	27/18903	0.0433766733708679	0.0989745523343216	0.0554438682184026	IL6	1
BP	GO:1904357	negative regulation of telomere maintenance via telomere lengthening	1/31	27/18903	0.0433766733708679	0.0989745523343216	0.0554438682184026	SRC	1
BP	GO:2000737	negative regulation of stem cell differentiation	1/31	27/18903	0.0433766733708679	0.0989745523343216	0.0554438682184026	NFE2L2	1
BP	GO:0051701	biological process involved in interaction with host	2/31	203/18903	0.0435254970978639	0.0991829359231376	0.055560601176165	HSPA1A/SRC	2
BP	GO:0050864	regulation of B cell activation	2/31	204/18903	0.0439123216225516	0.0998128804233949	0.0559134854179567	IL6/TLR4	2
BP	GO:0010876	lipid localization	3/31	483/18903	0.0439176673862938	0.0998128804233949	0.0559134854179567	APOH/IL6/SPP1	3
BP	GO:0043281	regulation of cysteine-type endopeptidase activity involved in apoptotic process	2/31	205/18903	0.0443004488111154	0.100550360788387	0.0563266094301994	SRC/GPX1	2
BP	GO:2000241	regulation of reproductive process	2/31	206/18903	0.0446898736602332	0.10125523409243	0.0567214675190547	SRC/CDKN1B	2
BP	GO:0002675	positive regulation of acute inflammatory response	1/31	28/18903	0.0449477330829625	0.10125523409243	0.0567214675190547	IL6	1
BP	GO:0030878	thyroid gland development	1/31	28/18903	0.0449477330829625	0.10125523409243	0.0567214675190547	MAP2K1	1
BP	GO:1902883	negative regulation of response to oxidative stress	1/31	28/18903	0.0449477330829625	0.10125523409243	0.0567214675190547	NFE2L2	1
BP	GO:1903319	positive regulation of protein maturation	1/31	28/18903	0.0449477330829625	0.10125523409243	0.0567214675190547	SRC	1
BP	GO:0002285	lymphocyte activation involved in immune response	2/31	207/18903	0.0450805911785428	0.10125523409243	0.0567214675190547	IL6/TLR4	2
BP	GO:0034284	response to monosaccharide	2/31	207/18903	0.0450805911785428	0.10125523409243	0.0567214675190547	CDKN1B/GPX1	2
BP	GO:1902115	regulation of organelle assembly	2/31	207/18903	0.0450805911785428	0.10125523409243	0.0567214675190547	HSPA1A/SRC	2
BP	GO:0016049	cell growth	3/31	493/18903	0.0462016888629082	0.103402848147845	0.0579245245459781	HSPA1A/SPP1/CDKN1B	3
BP	GO:0006921	cellular component disassembly involved in execution phase of apoptosis	1/31	29/18903	0.0465162957465087	0.103402848147845	0.0579245245459781	IL6	1
BP	GO:0010458	exit from mitosis	1/31	29/18903	0.0465162957465087	0.103402848147845	0.0579245245459781	CDKN1B	1
BP	GO:0010575	positive regulation of vascular endothelial growth factor production	1/31	29/18903	0.0465162957465087	0.103402848147845	0.0579245245459781	IL6	1
BP	GO:0031571	mitotic G1 DNA damage checkpoint signaling	1/31	29/18903	0.0465162957465087	0.103402848147845	0.0579245245459781	CDKN1B	1
BP	GO:0032607	interferon-alpha production	1/31	29/18903	0.0465162957465087	0.103402848147845	0.0579245245459781	TLR4	1
BP	GO:0032647	regulation of interferon-alpha production	1/31	29/18903	0.0465162957465087	0.103402848147845	0.0579245245459781	TLR4	1
BP	GO:0097421	liver regeneration	1/31	29/18903	0.0465162957465087	0.103402848147845	0.0579245245459781	IL6	1
BP	GO:0009612	response to mechanical stimulus	2/31	211/18903	0.0466562885337275	0.103447426376195	0.0579494965146284	SRC/TLR4	2
BP	GO:0042594	response to starvation	2/31	211/18903	0.0466562885337275	0.103447426376195	0.0579494965146284	ACADM/NFE2L2	2
BP	GO:0019221	cytokine-mediated signaling pathway	3/31	496/18903	0.0468983868978651	0.103850728368186	0.0581754194611717	HSPA1A/IL6/SRC	3
BP	GO:0016051	carbohydrate biosynthetic process	2/31	212/18903	0.0470533949445041	0.10406039266573	0.0582928698502764	ACADM/NR3C1	2
BP	GO:0002064	epithelial cell development	2/31	213/18903	0.047451764326133	0.104067854412739	0.0582970497945961	SRC/GPX1	2
BP	GO:0045637	regulation of myeloid cell differentiation	2/31	214/18903	0.0478513917703098	0.104067854412739	0.0582970497945961	HSPA1A/TLR4	2
BP	GO:0001975	response to amphetamine	1/31	30/18903	0.0480823651982336	0.104067854412739	0.0582970497945961	HPRT1	1
BP	GO:0002360	T cell lineage commitment	1/31	30/18903	0.0480823651982336	0.104067854412739	0.0582970497945961	IL6	1
BP	GO:0007271	synaptic transmission, cholinergic	1/31	30/18903	0.0480823651982336	0.104067854412739	0.0582970497945961	NQO1	1
BP	GO:0008209	androgen metabolic process	1/31	30/18903	0.0480823651982336	0.104067854412739	0.0582970497945961	SPP1	1
BP	GO:0009072	aromatic amino acid family metabolic process	1/31	30/18903	0.0480823651982336	0.104067854412739	0.0582970497945961	PAH	1
BP	GO:0010447	response to acidic pH	1/31	30/18903	0.0480823651982336	0.104067854412739	0.0582970497945961	SRC	1
BP	GO:0042744	hydrogen peroxide catabolic process	1/31	30/18903	0.0480823651982336	0.104067854412739	0.0582970497945961	GPX1	1
BP	GO:0043032	positive regulation of macrophage activation	1/31	30/18903	0.0480823651982336	0.104067854412739	0.0582970497945961	TLR4	1
BP	GO:0043094	cellular metabolic compound salvage	1/31	30/18903	0.0480823651982336	0.104067854412739	0.0582970497945961	HPRT1	1
BP	GO:0044819	mitotic G1/S transition checkpoint signaling	1/31	30/18903	0.0480823651982336	0.104067854412739	0.0582970497945961	CDKN1B	1
BP	GO:0070498	interleukin-1-mediated signaling pathway	1/31	30/18903	0.0480823651982336	0.104067854412739	0.0582970497945961	IL6	1
BP	GO:0072539	T-helper 17 cell differentiation	1/31	30/18903	0.0480823651982336	0.104067854412739	0.0582970497945961	IL6	1
BP	GO:0090330	regulation of platelet aggregation	1/31	30/18903	0.0480823651982336	0.104067854412739	0.0582970497945961	IL6	1
BP	GO:1903203	regulation of oxidative stress-induced neuron death	1/31	30/18903	0.0480823651982336	0.104067854412739	0.0582970497945961	TLR4	1
BP	GO:1903205	regulation of hydrogen peroxide-induced cell death	1/31	30/18903	0.0480823651982336	0.104067854412739	0.0582970497945961	NFE2L2	1
BP	GO:0007179	transforming growth factor beta receptor signaling pathway	2/31	216/18903	0.0486544012719227	0.105173987711863	0.058916686937904	HSPA1A/SRC	2
BP	GO:0002573	myeloid leukocyte differentiation	2/31	218/18903	0.0494623844179134	0.106252178150528	0.0595206709639569	SRC/TLR4	2
BP	GO:0043491	protein kinase B signaling	2/31	218/18903	0.0494623844179134	0.106252178150528	0.0595206709639569	SRC/GPX1	2
BP	GO:0043523	regulation of neuron apoptotic process	2/31	218/18903	0.0494623844179134	0.106252178150528	0.0595206709639569	NQO1/NR3C1	2
BP	GO:0002220	innate immune response activating cell surface receptor signaling pathway	1/31	31/18903	0.0496459452691741	0.106252178150528	0.0595206709639569	SRC	1
BP	GO:0002313	mature B cell differentiation involved in immune response	1/31	31/18903	0.0496459452691741	0.106252178150528	0.0595206709639569	IL6	1
BP	GO:0032148	activation of protein kinase B activity	1/31	31/18903	0.0496459452691741	0.106252178150528	0.0595206709639569	SRC	1
BP	GO:0060055	angiogenesis involved in wound healing	1/31	31/18903	0.0496459452691741	0.106252178150528	0.0595206709639569	GPX1	1
BP	GO:1902042	negative regulation of extrinsic apoptotic signaling pathway via death domain receptors	1/31	31/18903	0.0496459452691741	0.106252178150528	0.0595206709639569	GPX1	1
BP	GO:0001505	regulation of neurotransmitter levels	2/31	219/18903	0.0498682289614423	0.106595656701968	0.0597130818321321	BCHE/PAH	2
CC	GO:0005759	mitochondrial matrix	9/31	483/19869	3.44815814026883e-08	4.06882660551722e-06	2.83111931516809e-06	ACADL/ACADM/BCKDHB/NR3C1/TFAM/GPX1/OGDH/POLRMT/GLRX2	9
CC	GO:1990204	oxidoreductase complex	5/31	125/19869	1.35527403791823e-06	7.99611682371753e-05	5.56375657671693e-05	BCKDHB/NDUFA4/SDHD/OGDH/SDHC	5
CC	GO:0098798	mitochondrial protein-containing complex	6/31	295/19869	5.48454083236925e-06	0.000215725272739857	0.000150103222780632	BCKDHB/NDUFA4/SDHD/POLRMT/IMMT/SDHC	6
CC	GO:0098800	inner mitochondrial membrane protein complex	4/31	158/19869	0.000102454114481712	0.0030223963772105	0.00210300550778251	NDUFA4/SDHD/IMMT/SDHC	4
CC	GO:0045239	tricarboxylic acid cycle enzyme complex	2/31	16/19869	0.000278880144836952	0.00658157141815207	0.00457950553626995	BCKDHB/OGDH	2
CC	GO:0098803	respiratory chain complex	3/31	91/19869	0.000380693072622028	0.0070584532853859	0.00491132342783318	NDUFA4/SDHD/SDHC	3
CC	GO:0005746	mitochondrial respirasome	3/31	94/19869	0.000418721805065265	0.0070584532853859	0.00491132342783318	NDUFA4/SDHD/SDHC	3
CC	GO:0070469	respirasome	3/31	101/19869	0.000516746768804641	0.00762201483986846	0.00530345367983711	NDUFA4/SDHD/SDHC	3
CC	GO:0005743	mitochondrial inner membrane	5/31	498/19869	0.000960967264803939	0.012599348582985	0.0087667189069833	NDUFA4/SDHD/SRC/IMMT/SDHC	5
CC	GO:0005788	endoplasmic reticulum lumen	4/31	312/19869	0.00134301585116657	0.0158031563305015	0.0109959517732303	BCHE/CP/IL6/SPP1	4
CC	GO:0072562	blood microparticle	3/31	145/19869	0.00147317559013149	0.0158031563305015	0.0109959517732303	BCHE/CP/HSPA1A	3
CC	GO:0009295	nucleoid	2/31	45/19869	0.00223685808078912	0.0203037887333166	0.0141275247207734	TFAM/POLRMT	2
CC	GO:0042645	mitochondrial nucleoid	2/31	45/19869	0.00223685808078912	0.0203037887333166	0.0141275247207734	TFAM/POLRMT	2
CC	GO:0016234	inclusion body	2/31	76/19869	0.00624892188335395	0.0526694844454119	0.0366478125489931	HSPA1A/GPX1	2
CC	GO:0043025	neuronal cell body	4/31	497/19869	0.00712610709850922	0.0560587091749392	0.0390060599076294	NQO1/PVALB/SRC/GLRX2	4
CC	GO:0031970	organelle envelope lumen	2/31	94/19869	0.00941854702209894	0.0694617842879797	0.0483320176134025	BCHE/IMMT	2
CC	GO:0005641	nuclear envelope lumen	1/31	10/19869	0.0154965915161775	0.0988253651651617	0.0687634119793275	BCHE	1
CC	GO:0099091	postsynaptic specialization, intracellular component	1/31	10/19869	0.0154965915161775	0.0988253651651617	0.0687634119793275	SRC	1
CC	GO:0030062	mitochondrial tricarboxylic acid cycle enzyme complex	1/31	11/19869	0.0170334063438629	0.0988253651651617	0.0687634119793275	BCKDHB	1
CC	GO:0001401	SAM complex	1/31	13/19869	0.0201000742708803	0.0988253651651617	0.0687634119793275	IMMT	1
CC	GO:0031464	Cul4A-RING E3 ubiquitin ligase complex	1/31	13/19869	0.0201000742708803	0.0988253651651617	0.0687634119793275	CDKN1B	1
CC	GO:0042627	chylomicron	1/31	13/19869	0.0201000742708803	0.0988253651651617	0.0687634119793275	APOH	1
CC	GO:0044292	dendrite terminus	1/31	13/19869	0.0201000742708803	0.0988253651651617	0.0687634119793275	SRC	1
CC	GO:0140275	MIB complex	1/31	13/19869	0.0201000742708803	0.0988253651651617	0.0687634119793275	IMMT	1
CC	GO:0031089	platelet dense granule lumen	1/31	14/19869	0.0216299341468682	0.102093289173218	0.0710372574086619	APOH	1
CC	GO:0005925	focal adhesion	3/31	422/19869	0.0275441695258656	0.122851012981647	0.0854806334751873	HSPA1A/MAP2K1/SRC	3
CC	GO:0030055	cell-substrate junction	3/31	432/19869	0.0292477673036418	0.122851012981647	0.0854806334751873	HSPA1A/MAP2K1/SRC	3
CC	GO:0034361	very-low-density lipoprotein particle	1/31	20/19869	0.030760668890657	0.122851012981647	0.0854806334751873	APOH	1
CC	GO:0034385	triglyceride-rich plasma lipoprotein particle	1/31	20/19869	0.030760668890657	0.122851012981647	0.0854806334751873	APOH	1
CC	GO:0001726	ruffle	2/31	178/19869	0.0313083939897086	0.122851012981647	0.0854806334751873	SRC/TLR4	2
CC	GO:0042827	platelet dense granule	1/31	21/19869	0.0322744186646701	0.122851012981647	0.0854806334751873	APOH	1
CC	GO:0005742	mitochondrial outer membrane translocase complex	1/31	22/19869	0.0337858804251194	0.124585434067628	0.0866874563539249	IMMT	1
CC	GO:0098799	outer mitochondrial membrane protein complex	1/31	23/19869	0.0352950575151998	0.126206569296775	0.0878154541048033	IMMT	1
CC	GO:0005751	mitochondrial respiratory chain complex IV	1/31	25/19869	0.0383065710334558	0.132926346628032	0.0924911243263737	NDUFA4	1
CC	GO:0005741	mitochondrial outer membrane	2/31	207/19869	0.0412143239863585	0.132926346628032	0.0924911243263737	UBC/IMMT	2
CC	GO:0034364	high-density lipoprotein particle	1/31	27/19869	0.0413089858707792	0.132926346628032	0.0924911243263737	APOH	1
CC	GO:0001891	phagocytic cup	1/31	28/19869	0.0428067895920781	0.132926346628032	0.0924911243263737	TLR4	1
CC	GO:0045277	respiratory chain complex IV	1/31	28/19869	0.0428067895920781	0.132926346628032	0.0924911243263737	NDUFA4	1
CC	GO:0002102	podosome	1/31	30/19869	0.0457956062149071	0.138561064957924	0.0964118025576991	SRC	1
CC	GO:0098858	actin-based cell projection	2/31	223/19869	0.0471227318537494	0.139012058968561	0.096725607489275	PVALB/SRC	2
MF	GO:0031072	heat shock protein binding	5/31	124/18432	1.87672501955646e-06	0.000252535116603392	0.000169877250658152	HSPA1A/NR3C1/TFAM/CDKN1B/OGDH	5
MF	GO:0016627	oxidoreductase activity, acting on the CH-CH group of donors	4/31	60/18432	2.9885812615786e-06	0.000252535116603392	0.000169877250658152	ACADL/ACADM/SDHD/SDHC	4
MF	GO:0009055	electron transfer activity	4/31	122/18432	5.00570529561869e-05	0.00281988064986519	0.00189689884886603	NDUFA4/SDHD/GLRX2/SDHC	4
MF	GO:0003995	acyl-CoA dehydrogenase activity	2/31	12/18432	0.000178792452926749	0.00604318490892411	0.00406517577180818	ACADL/ACADM	2
MF	GO:0052890	oxidoreductase activity, acting on the CH-CH group of donors, with a flavin as acceptor	2/31	12/18432	0.000178792452926749	0.00604318490892411	0.00406517577180818	ACADL/ACADM	2
MF	GO:0060229	lipase activator activity	2/31	17/18432	0.000366494566830094	0.0100178011109807	0.00673885094977215	APOH/SRC	2
MF	GO:0050660	flavin adenine dinucleotide binding	3/31	87/18432	0.000414938507555415	0.0100178011109807	0.00673885094977215	ACADL/ACADM/FMO4	3
MF	GO:0051087	chaperone binding	3/31	105/18432	0.000718988880098556	0.015188640092082	0.0102172104014005	CP/CDKN1B/OGDH	3
MF	GO:0020037	heme binding	3/31	139/18432	0.00161625609665396	0.0303496978149465	0.02041586648405	SDHD/SRC/SDHC	3
MF	GO:0046906	tetrapyrrole binding	3/31	149/18432	0.00197121366423547	0.0333135109255794	0.0224095869197295	SDHD/SRC/SDHC	3
MF	GO:0050136	NADH dehydrogenase (quinone) activity	2/31	42/18432	0.0022602911169151	0.0336804162571605	0.0226563995999585	NDUFA4/NQO1	2
MF	GO:0003954	NADH dehydrogenase activity	2/31	44/18432	0.00247824423951541	0.0336804162571605	0.0226563995999585	NDUFA4/NQO1	2
MF	GO:0003955	NAD(P)H dehydrogenase (quinone) activity	2/31	45/18432	0.00259080125055081	0.0336804162571605	0.0226563995999585	NDUFA4/NQO1	2
MF	GO:0016903	oxidoreductase activity, acting on the aldehyde or oxo group of donors	2/31	47/18432	0.00282303714843505	0.0340780912918231	0.0229239106790215	BCKDHB/OGDH	2
MF	GO:0016655	oxidoreductase activity, acting on NAD(P)H, quinone or similar compound as acceptor	2/31	57/18432	0.00412464244828925	0.0464709715840589	0.0312604480291396	NDUFA4/NQO1	2
MF	GO:0097110	scaffold protein binding	2/31	66/18432	0.00549162181378155	0.0580052554080676	0.0390194181505531	MAP2K1/SRC	2
MF	GO:0001540	amyloid-beta binding	2/31	85/18432	0.00896064756527457	0.083346507659106	0.0560661652269289	BCHE/TLR4	2
MF	GO:0016209	antioxidant activity	2/31	85/18432	0.00896064756527457	0.083346507659106	0.0560661652269289	NQO1/GPX1	2
MF	GO:0016651	oxidoreductase activity, acting on NAD(P)H	2/31	87/18432	0.00937031742913025	0.083346507659106	0.0560661652269289	NDUFA4/NQO1	2
MF	GO:1901681	sulfur compound binding	3/31	270/18432	0.0103216727124779	0.0856962993478808	0.0576468410437317	ACADL/APOH/OGDH	3
MF	GO:0140678	molecular function inhibitor activity	2/31	93/18432	0.0106486525816893	0.0856962993478808	0.0576468410437317	HSPA1A/CDKN1B	2
MF	GO:0004497	monooxygenase activity	2/31	104/18432	0.0131802967500001	0.100416648381601	0.0675490378400058	FMO4/PAH	2
MF	GO:0047485	protein N-terminus binding	2/31	106/18432	0.0136661710815197	0.100416648381601	0.0675490378400058	HSPA1A/MAP2K1	2
MF	GO:0001221	transcription coregulator binding	2/31	109/18432	0.0144094653301715	0.101466651699957	0.0682553620902859	TFAM/NFE2L2	2
MF	GO:0016634	oxidoreductase activity, acting on the CH-CH group of donors, oxygen as acceptor	1/31	10/18432	0.0166959023115822	0.108523365025285	0.0730023258967969	ACADL	1
MF	GO:0016653	oxidoreductase activity, acting on NAD(P)H, heme protein as acceptor	1/31	10/18432	0.0166959023115822	0.108523365025285	0.0730023258967969	NQO1	1
MF	GO:0005078	MAP-kinase scaffold activity	1/31	11/18432	0.0183505775383949	0.114861022369953	0.0772655896353468	MAP2K1	1
MF	GO:0004861	cyclin-dependent protein serine/threonine kinase inhibitor activity	1/31	12/18432	0.0200025580007102	0.116566631107587	0.0784129315454337	CDKN1B	1
MF	GO:0140776	protein-containing complex destabilizing activity	1/31	12/18432	0.0200025580007102	0.116566631107587	0.0784129315454337	HSPA1A	1
MF	GO:0031386	protein tag	1/31	13/18432	0.0216518479410998	0.117349229004604	0.0789393754749126	UBC	1
MF	GO:0004713	protein tyrosine kinase activity	2/31	138/18432	0.0224557849572214	0.117349229004604	0.0789393754749126	MAP2K1/SRC	2
MF	GO:0070851	growth factor receptor binding	2/31	140/18432	0.0230659571086663	0.117349229004604	0.0789393754749126	IL6/SRC	2
MF	GO:0016004	phospholipase activator activity	1/31	14/18432	0.0232984515956862	0.117349229004604	0.0789393754749126	SRC	1
MF	GO:0070700	BMP receptor binding	1/31	15/18432	0.0249423731941514	0.117349229004604	0.0789393754749126	SRC	1
MF	GO:0003953	NAD+ nucleosidase activity	1/31	16/18432	0.0265836169597472	0.117349229004604	0.0789393754749126	TLR4	1
MF	GO:0016722	oxidoreductase activity, acting on metal ions	1/31	16/18432	0.0265836169597472	0.117349229004604	0.0789393754749126	CP	1
MF	GO:0050135	NAD(P)+ nucleosidase activity	1/31	16/18432	0.0265836169597472	0.117349229004604	0.0789393754749126	TLR4	1
MF	GO:0061809	NAD+ nucleotidase, cyclic ADP-ribose generating	1/31	16/18432	0.0265836169597472	0.117349229004604	0.0789393754749126	TLR4	1
MF	GO:0005178	integrin binding	2/31	156/18432	0.0281897878676854	0.117349229004604	0.0789393754749126	SPP1/SRC	2
MF	GO:0048038	quinone binding	1/31	17/18432	0.0282221871093048	0.117349229004604	0.0789393754749126	SDHD	1
MF	GO:0003756	protein disulfide isomerase activity	1/31	18/18432	0.0298580878532424	0.117349229004604	0.0789393754749126	GLRX2	1
MF	GO:0004708	MAP kinase kinase activity	1/31	18/18432	0.0298580878532424	0.117349229004604	0.0789393754749126	MAP2K1	1
MF	GO:0016864	intramolecular oxidoreductase activity, transposing S-S bonds	1/31	18/18432	0.0298580878532424	0.117349229004604	0.0789393754749126	GLRX2	1
MF	GO:0033218	amide binding	3/31	408/18432	0.030607276824915	0.117559767804787	0.0790810023227468	ACADL/BCHE/TLR4	3
MF	GO:0008301	DNA binding, bending	1/31	19/18432	0.0314913233955768	0.118267414530055	0.0795570275256677	TFAM	1
MF	GO:0016705	oxidoreductase activity, acting on paired donors, with incorporation or reduction of molecular oxygen	2/31	179/18432	0.0362734214137546	0.121162469085984	0.0815044949317117	FMO4/PAH	2
MF	GO:0000062	fatty-acyl-CoA binding	1/31	22/18432	0.0363750807572923	0.121162469085984	0.0815044949317117	ACADL	1
MF	GO:0004602	glutathione peroxidase activity	1/31	22/18432	0.0363750807572923	0.121162469085984	0.0815044949317117	GPX1	1
MF	GO:0005158	insulin receptor binding	1/31	22/18432	0.0363750807572923	0.121162469085984	0.0815044949317117	SRC	1
MF	GO:0008022	protein C-terminus binding	2/31	181/18432	0.0370143649969736	0.121162469085984	0.0815044949317117	MAP2K1/SRC	2
MF	GO:0043274	phospholipase binding	1/31	23/18432	0.0379976974056637	0.121162469085984	0.0815044949317117	SRC	1
MF	GO:0140416	transcription regulator inhibitor activity	1/31	23/18432	0.0379976974056637	0.121162469085984	0.0815044949317117	HSPA1A	1
MF	GO:1901567	fatty acid derivative binding	1/31	23/18432	0.0379976974056637	0.121162469085984	0.0815044949317117	ACADL	1
MF	GO:0003707	nuclear steroid receptor activity	1/31	24/18432	0.0396176697768098	0.121734294405106	0.0818891547539801	NR3C1	1
MF	GO:0051537	2 iron, 2 sulfur cluster binding	1/31	24/18432	0.0396176697768098	0.121734294405106	0.0818891547539801	GLRX2	1
MF	GO:0120227	acyl-CoA binding	1/31	25/18432	0.0412350020365293	0.124441345431669	0.0837101545102475	ACADL	1
MF	GO:0070696	transmembrane receptor protein serine/threonine kinase binding	1/31	26/18432	0.0428496983442855	0.127045596845338	0.0854620022379102	SRC	1
MF	GO:0038187	pattern recognition receptor activity	1/31	27/18432	0.0444617628532133	0.129552377968846	0.0871482829064799	TLR4	1
MF	GO:0003899	DNA-directed 5'-3' RNA polymerase activity	1/31	29/18432	0.0476780130555434	0.132091544366997	0.0888563487488989	POLRMT	1
MF	GO:0046875	ephrin receptor binding	1/31	29/18432	0.0476780130555434	0.132091544366997	0.0888563487488989	SRC	1
MF	GO:0051787	misfolded protein binding	1/31	29/18432	0.0476780130555434	0.132091544366997	0.0888563487488989	HSPA1A	1
